# Supplementary material for: Gold-catalysed allylic alkylation of aromatic and heteroaromatic compounds with allylic alcohols
Source: Royal Society of Chemistry journal article supplement (doi:10.1039/b805067h), 2008-01-01

**Electronic Supplementary Information**  
**for**  
**Gold-Catalysed Allylic Alkylation of Aromatic and Heteroaromatic Compounds**  
**with Allylic Alcohols**

Weidong Rao and Philip Wai Hong Chan\*

*Division of Chemistry and Biological Chemistry, School of Physical and  
Mathematical Sciences, Nanyang Technological University, Singapore 637371,  
Singapore*

**General procedure for comparing the catalytic activity of a series of Lewis and Brønsted acid catalysts for the allylation of 1a with 2l:** To a round bottom flask containing **1a** (0.3 mmol), **2l** (1.2 mmol) and 4Å molecular sieves (50 mg) in 2 mL of CH<sub>2</sub>Cl<sub>2</sub>, was added 5 mol% of Lewis or Brønsted acid catalyst under an N<sub>2</sub> atmosphere. The mixture was stirred at room temperature and monitored by TLC analysis. On completion, the reaction mixture was filtered through Celite<sup>®</sup> and washed with CH<sub>2</sub>Cl<sub>2</sub> (20 mL). The solvent was removed under reduced pressure and the residue was subjected to purification by flash column chromatography to give **3r** with the yields reported in Table S1.

**Table S1.** Comparison of Lewis and Brønsted acid catalysts for the allylation of **1a** with **2l**<sup>a</sup>

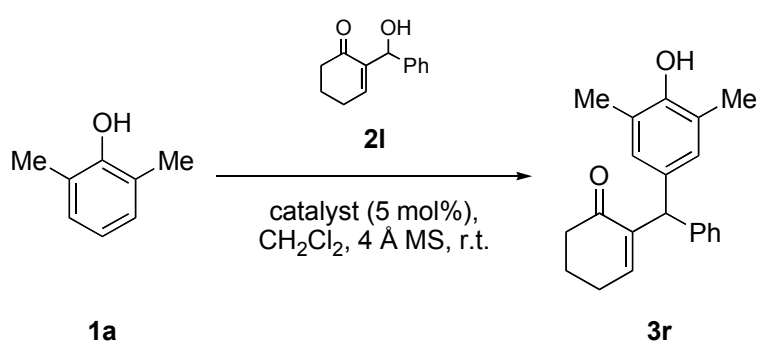

| entry | catalyst                            | yield (%) <sup>b</sup> |
|-------|-------------------------------------|------------------------|
| 1     | AuCl <sub>3</sub>                   | 98                     |
| 2     | InCl <sub>3</sub>                   | - <sup>c</sup>         |
| 3     | Cu(OTf) <sub>2</sub>                | - <sup>c</sup>         |
| 4     | NaAlCl <sub>4</sub>                 | - <sup>c</sup>         |
| 5     | ZnCl <sub>2</sub>                   | - <sup>c</sup>         |
| 6     | BF <sub>3</sub> .Et <sub>2</sub> .O | 65                     |
| 7     | TfOH                                | 88                     |
| 8     | <i>p</i> -TsOH.H <sub>2</sub> O     | 40                     |

<sup>a</sup> All reactions were performed at r.t. for 1.5 h and 4 Å MS with a catalyst: **1a**: **2l** ratio = 1: 20: 80. <sup>b</sup> Isolated yields. <sup>c</sup> No reaction.

**Figure S1.**  $^1\text{H}$  and  $^{13}\text{C}$  NMR spectra of (*E*)-4-(1,3-bis(4-bromophenyl)allyl)-2,6-dimethylphenol (**3a**)

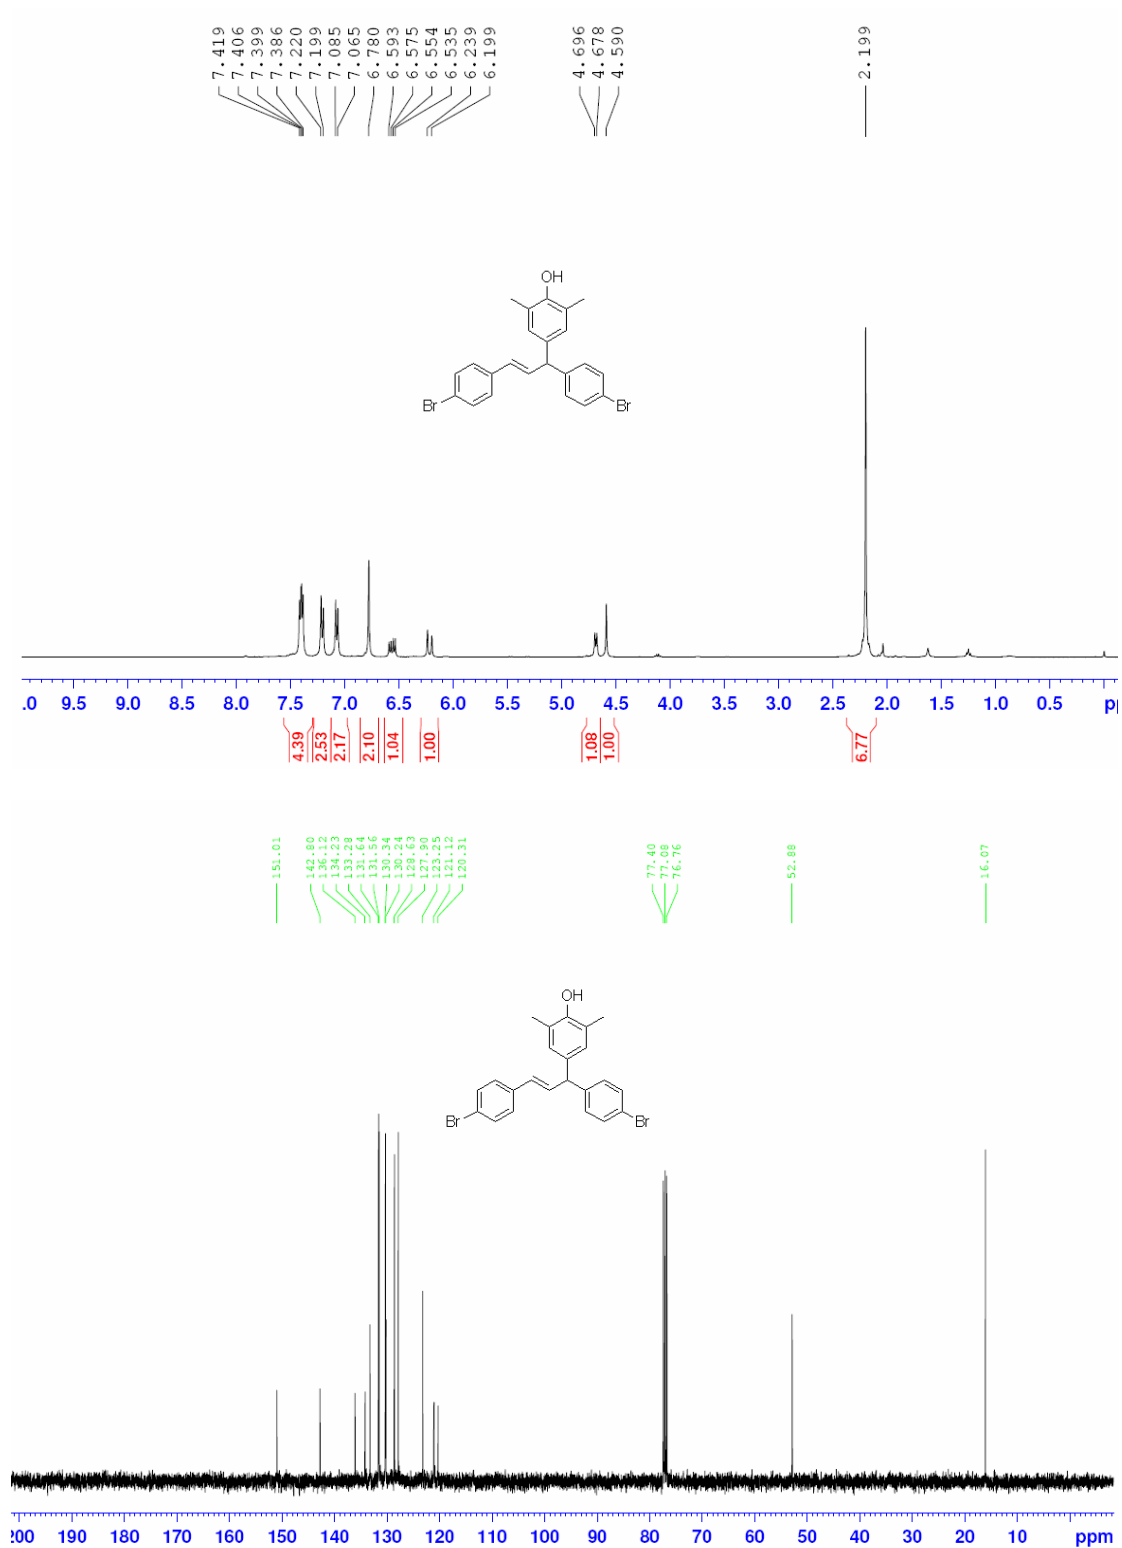

**Figure S2.**  $^1\text{H}$  and  $^{13}\text{C}$  NMR spectra of (*E*)-4-(1,3-di-*p*-tolylallyl)-2,6-dimethylphenol  
**(3b)**

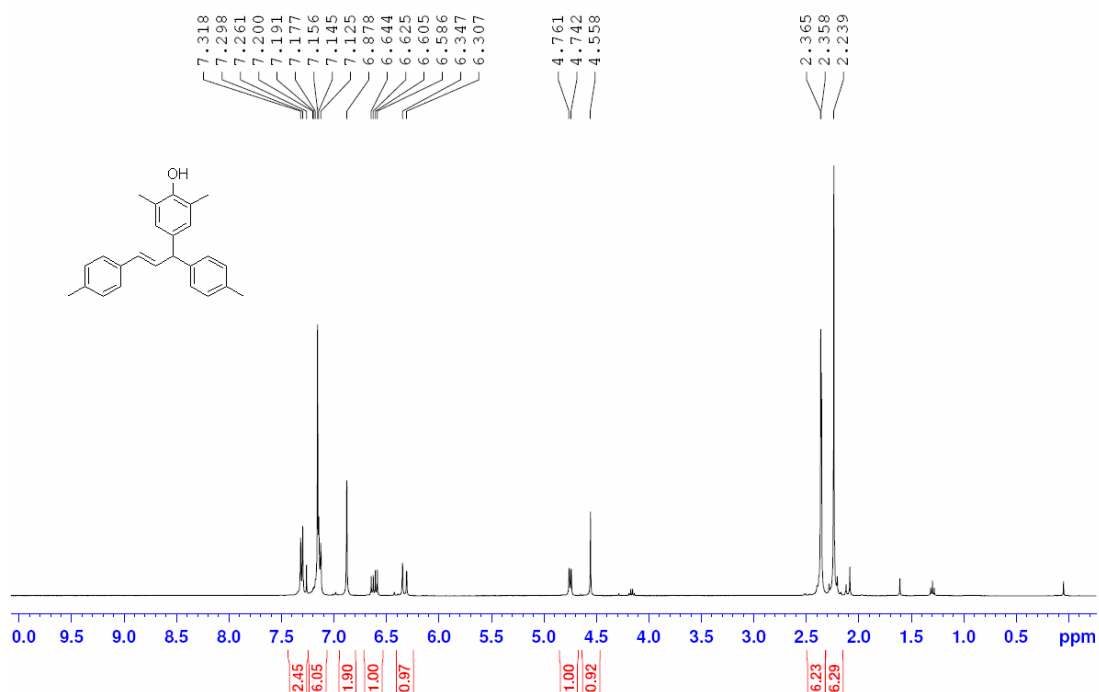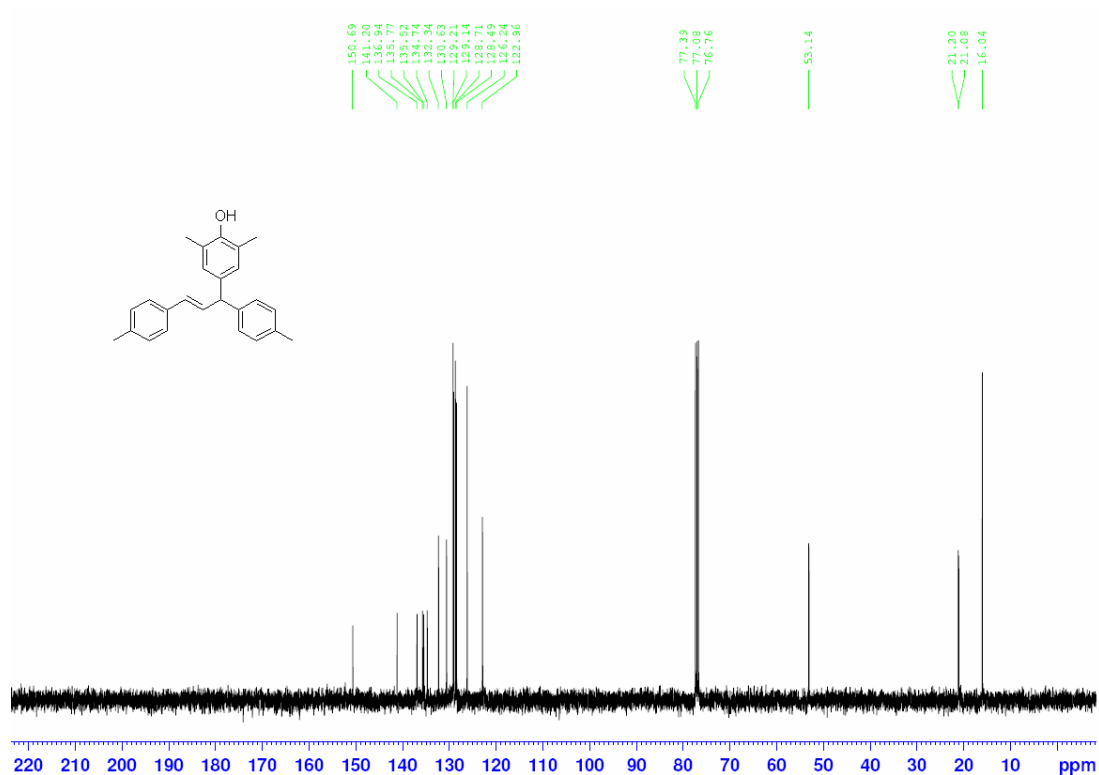

**Figure S3.**  $^1\text{H}$  and  $^{13}\text{C}$  NMR spectra of (*E*)-4-(1,3-diphenylallyl)-2,6-dimethylphenol  
(3c)

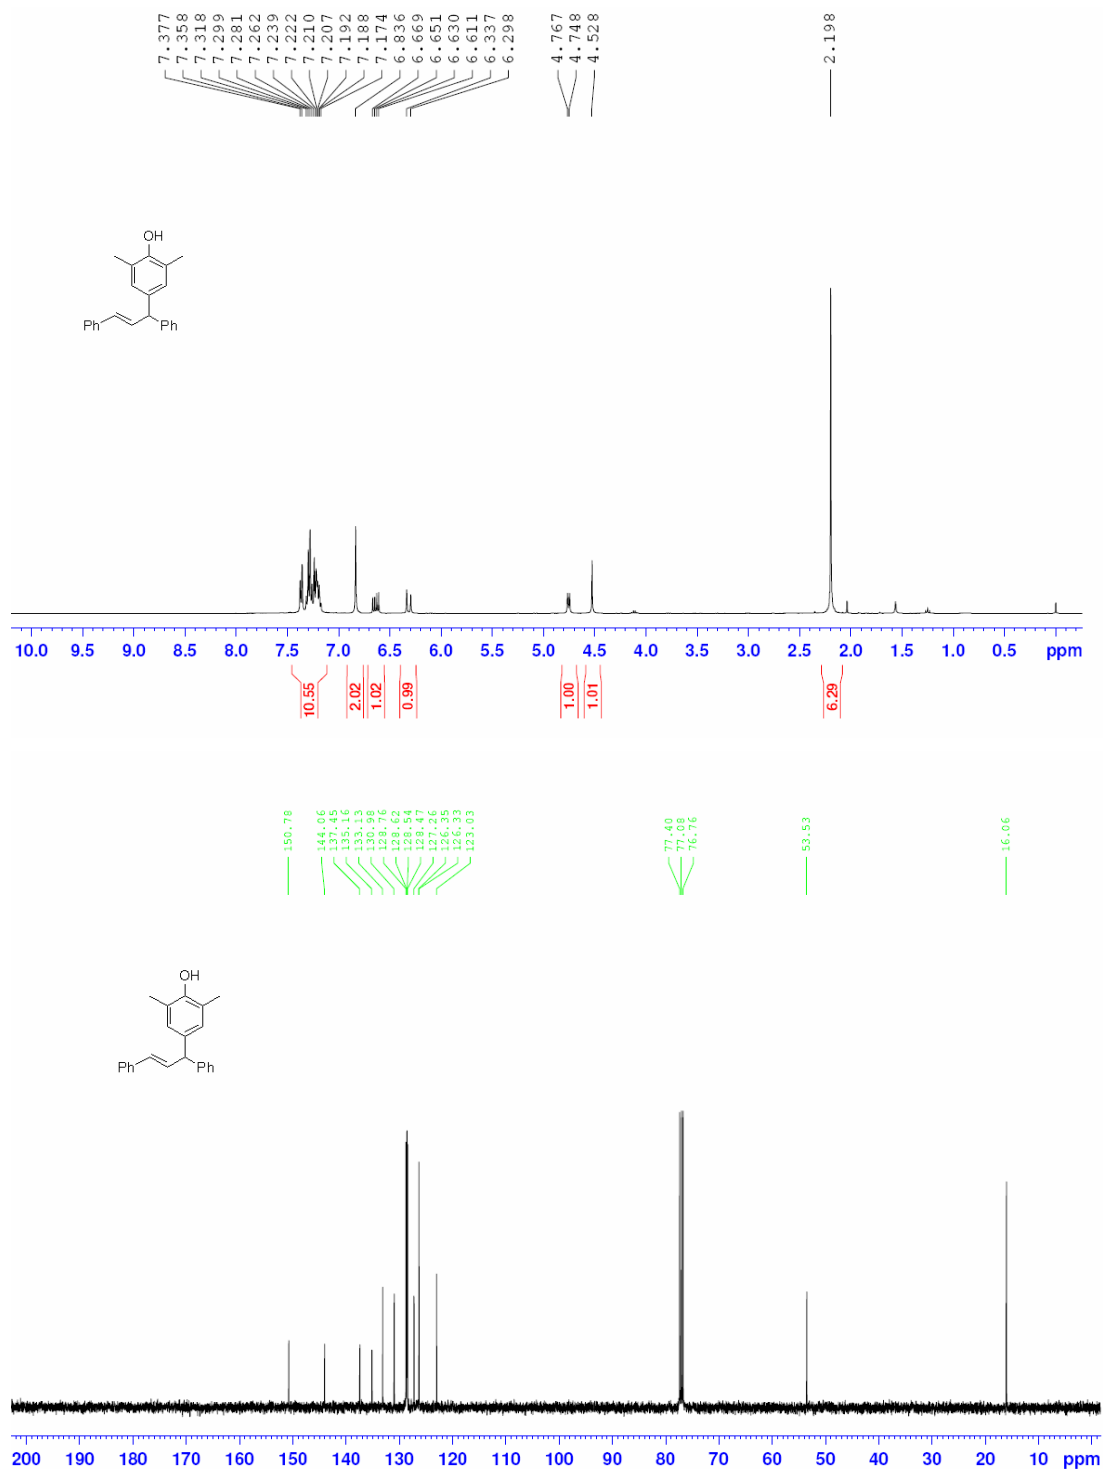

**Figure S4.**  $^1\text{H}$  and  $^{13}\text{C}$  NMR spectra of (*E*)-4-(1,3-bis(4-bromophenyl)allyl)-2-methylphenol (**3d**)

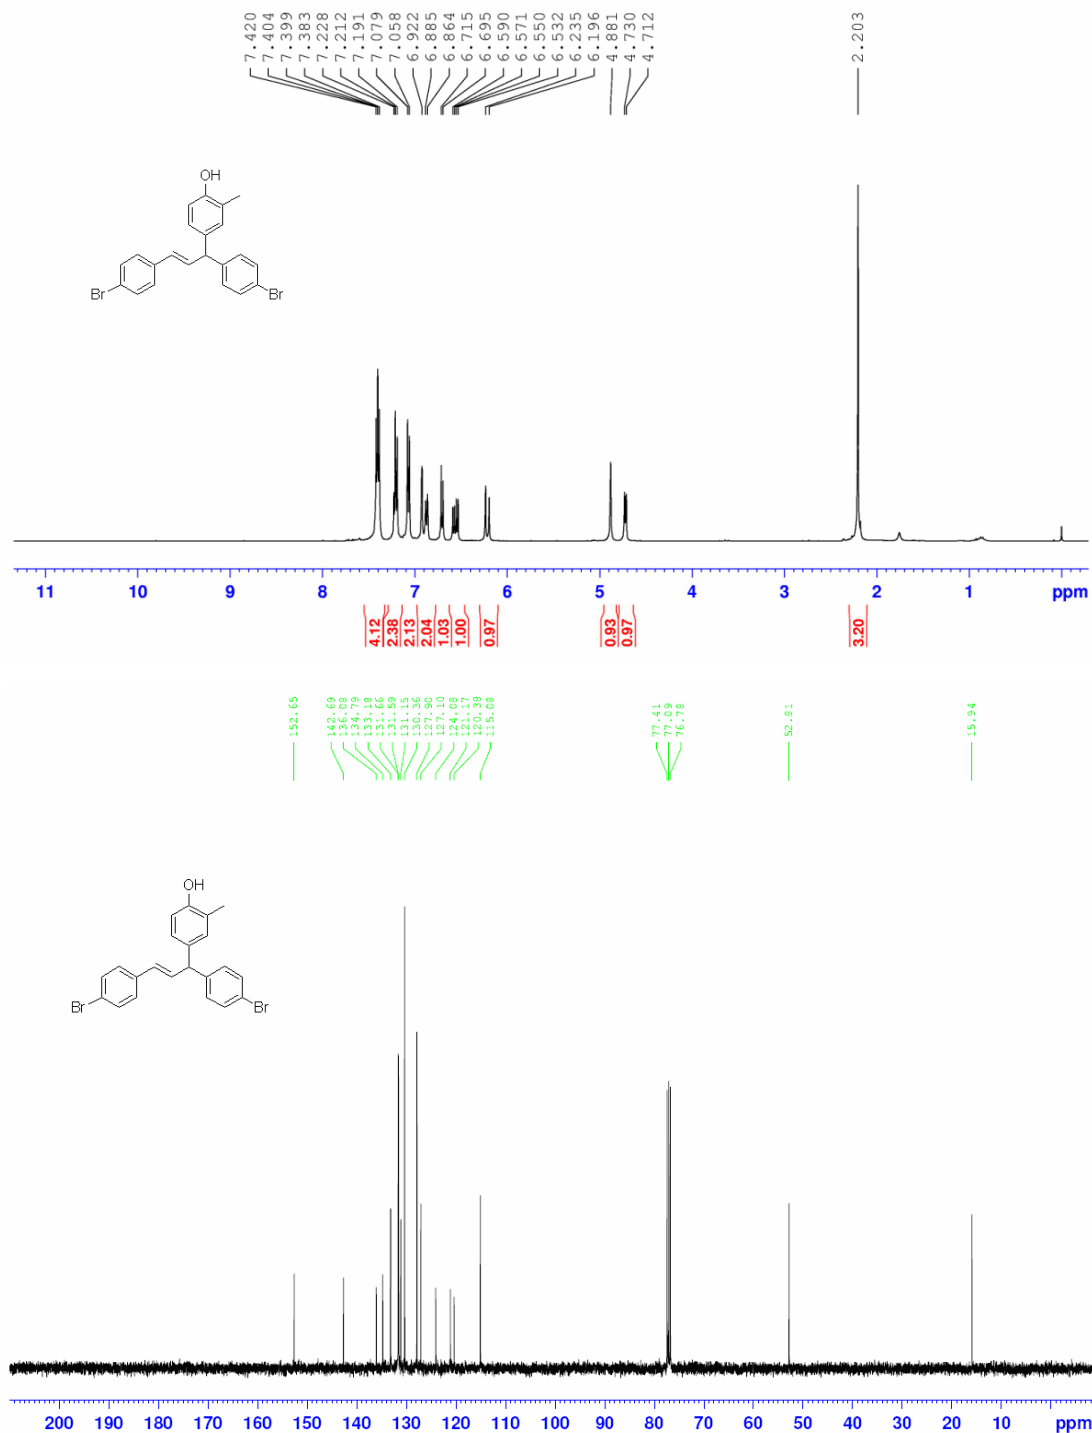

**Figure S5.**  $^1\text{H}$  and  $^{13}\text{C}$  NMR spectra of (*E*)-4-(1,3-di-*p*-tolylallyl)-2-methylphenol  
(3e)

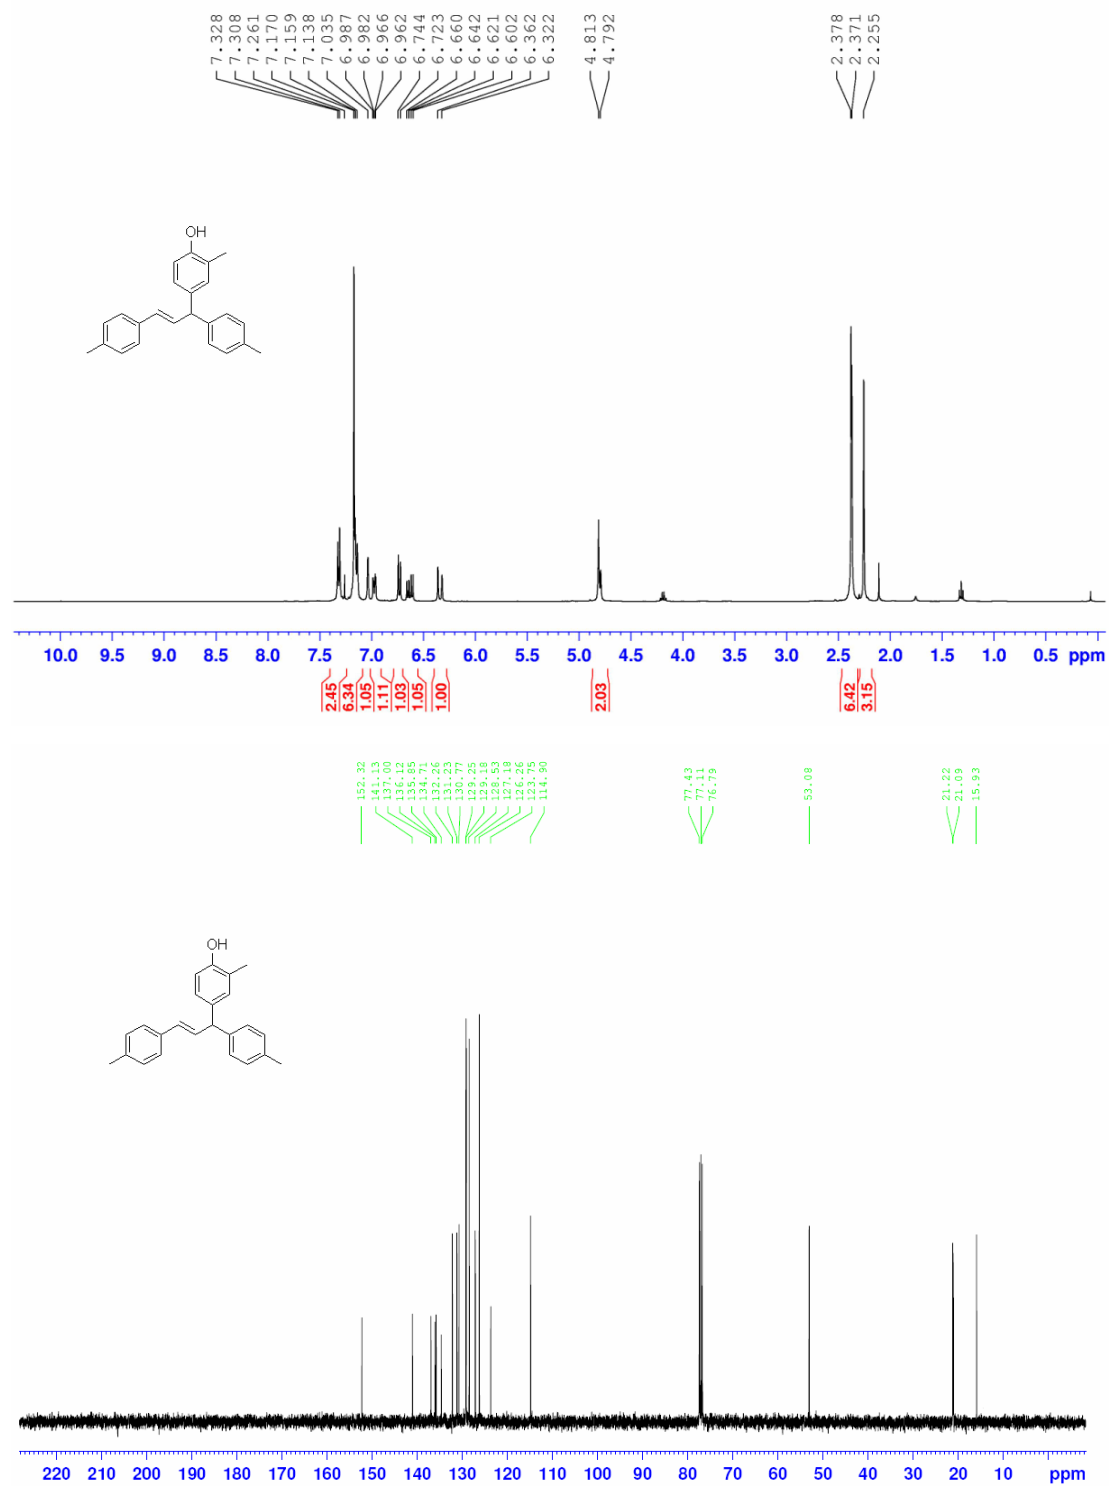

**Figure S6.**  $^1\text{H}$  and  $^{13}\text{C}$  NMR spectra of (*E*)-4,4'-(3-(4-(allyloxy)phenyl)prop-1-ene-1,3-diyl)bis(bromobenzene) (**3f**)

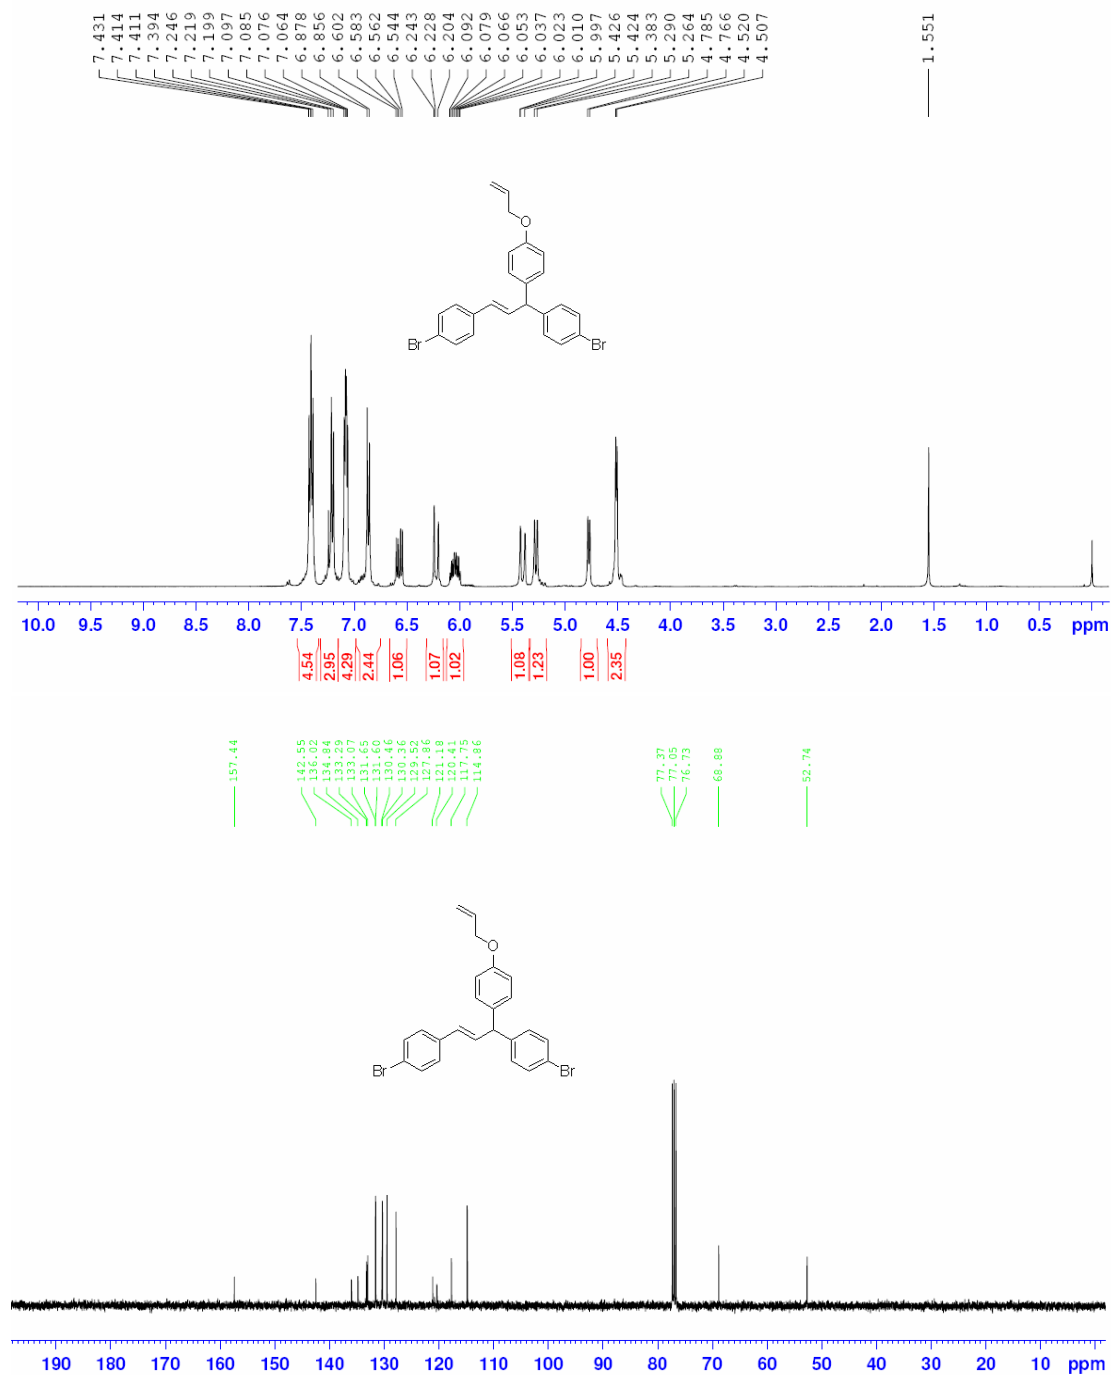



**Figure S7.**  $^1\text{H}$  and  $^{13}\text{C}$  NMR spectra of (*E*)-4,4'-(3-(4-methoxyphenyl)prop-1-ene-1,3-diyl)bis(bromobenzene) (**3g**)

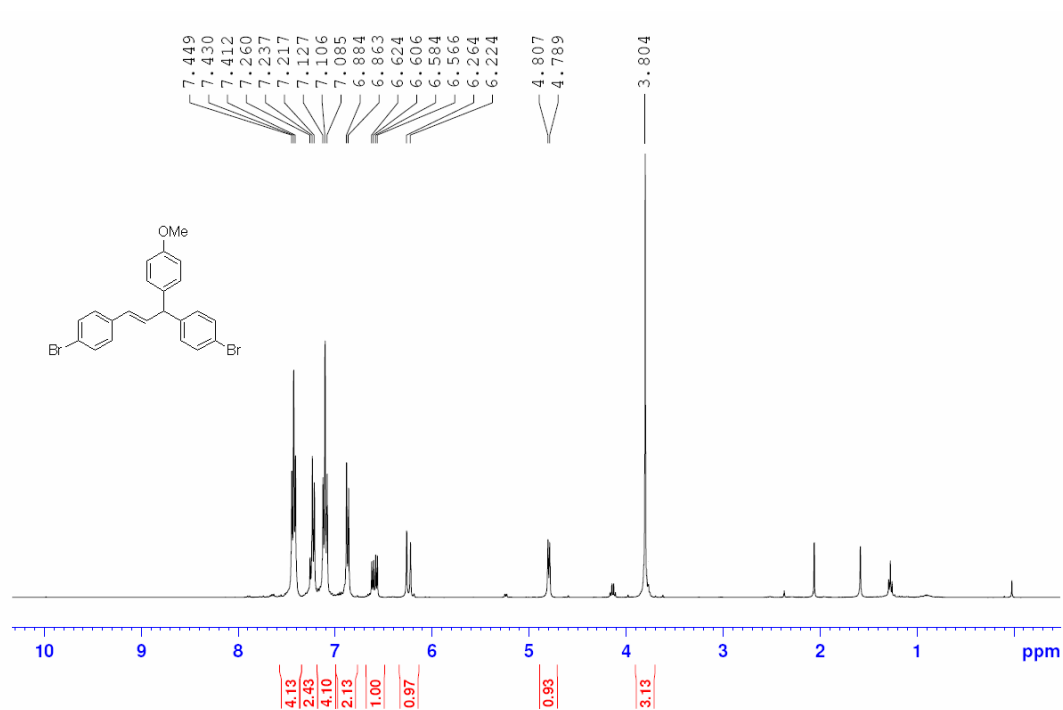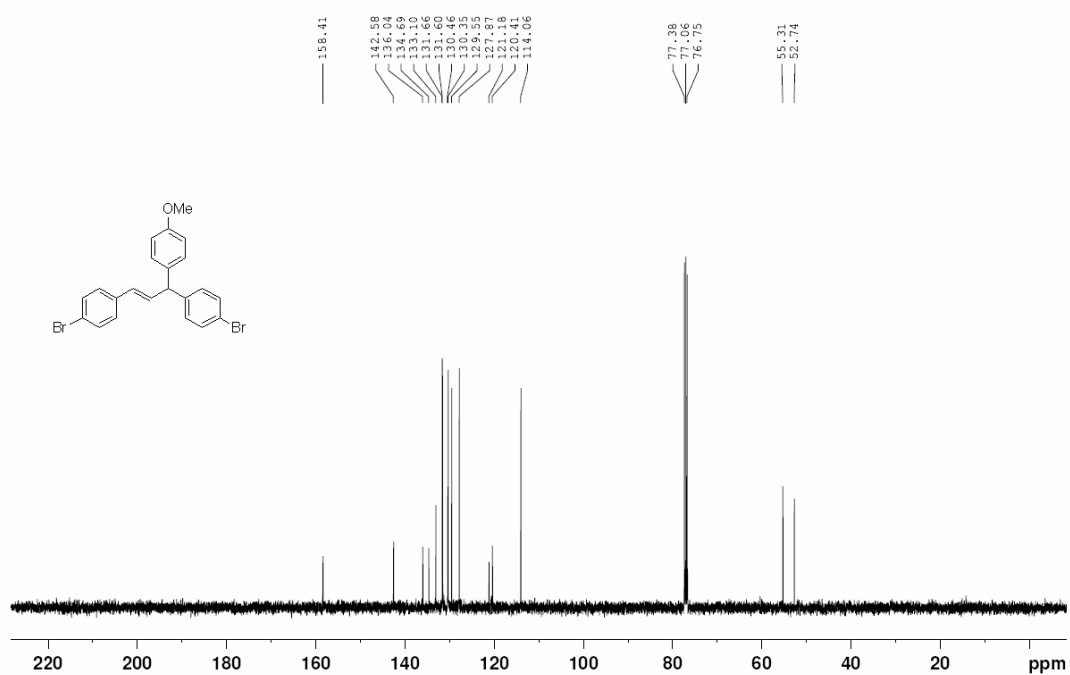

**Figure S8.**  $^1\text{H}$  and  $^{13}\text{C}$  NMR spectra of (*E*)-5-(1,3-bis(4-bromophenyl)allyl)benzo[d][1,3]dioxole (**3h**)

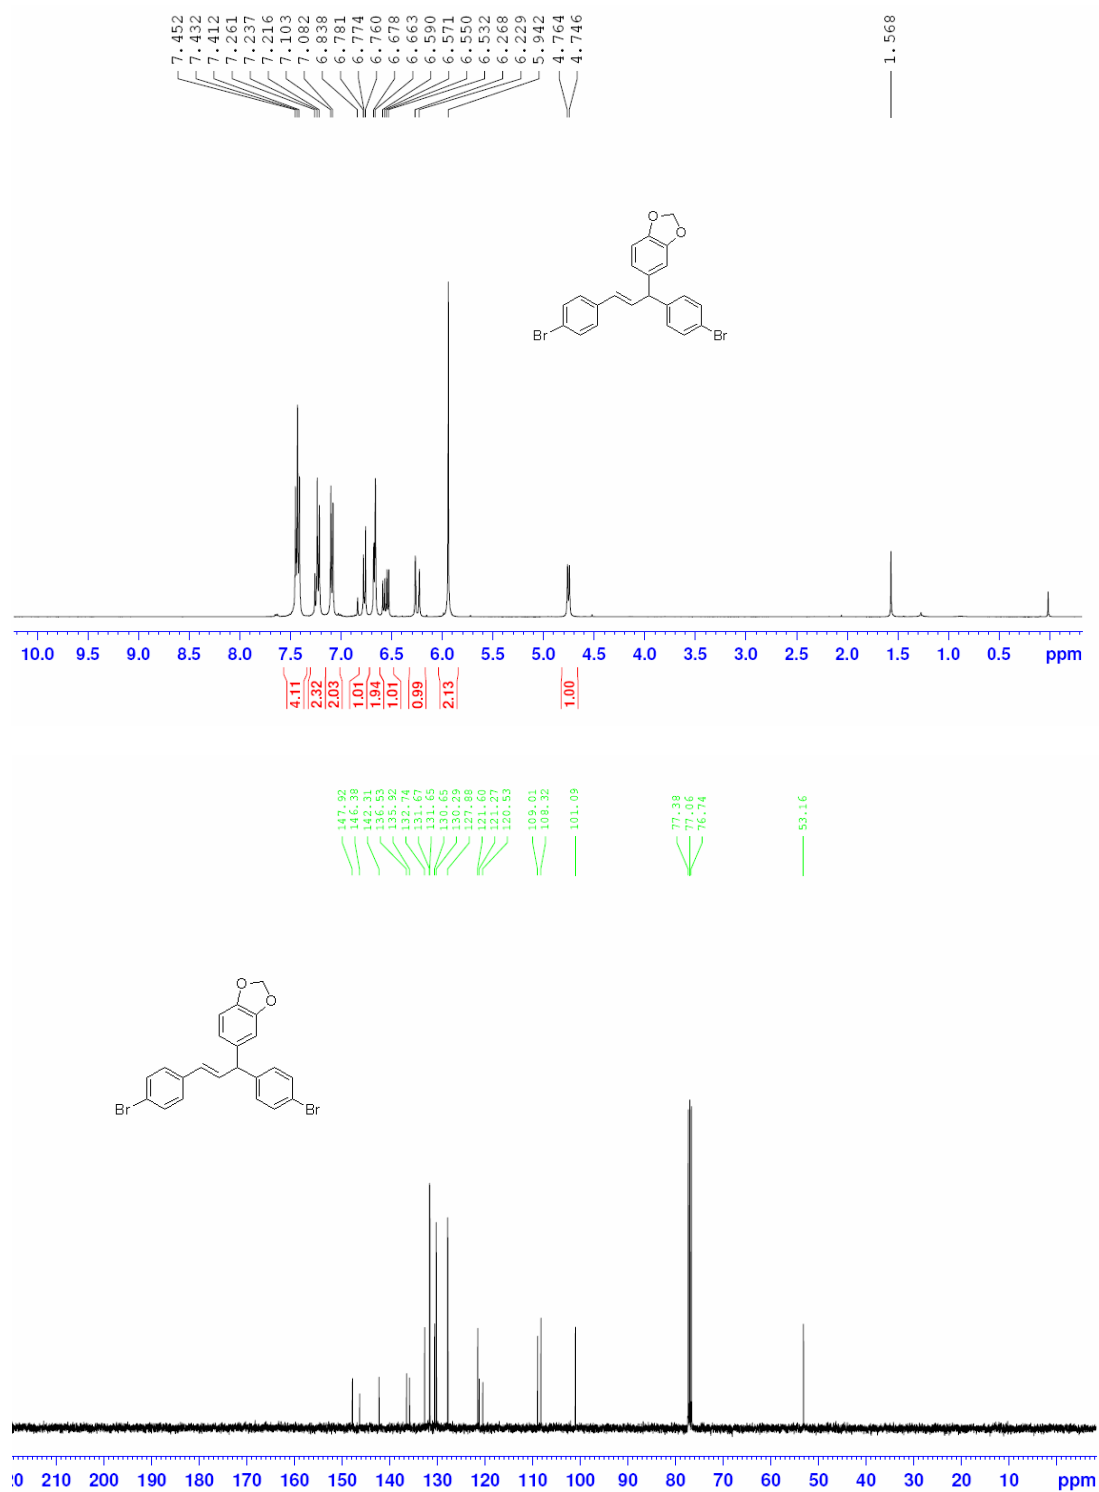

**Figure S9.**  $^1\text{H}$  and  $^{13}\text{C}$  NMR spectra of (*E*)-1-(1,3-bis(4-bromophenyl)allyl)-2,4-dimethylbenzene (**3i**)

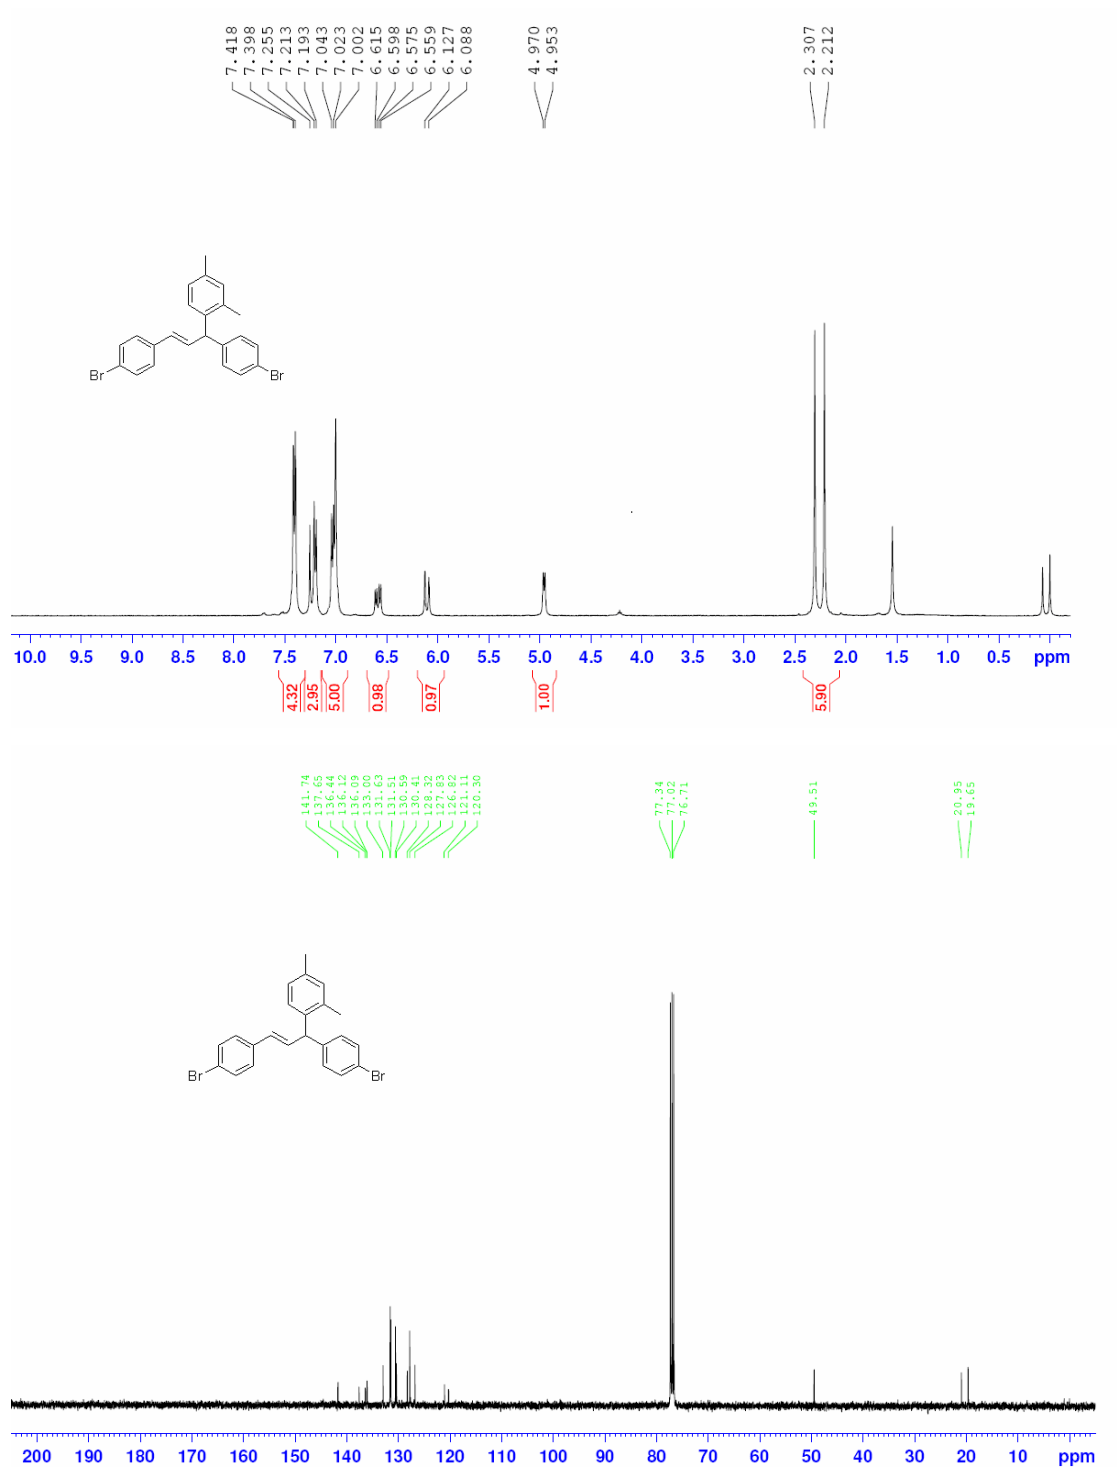

**Figure S10.**  $^1\text{H}$  and  $^{13}\text{C}$  NMR spectra of (*E*)-2,6-dimethyl-4-(4-phenylbut-3-en-2-yl)phenol (**3j**)

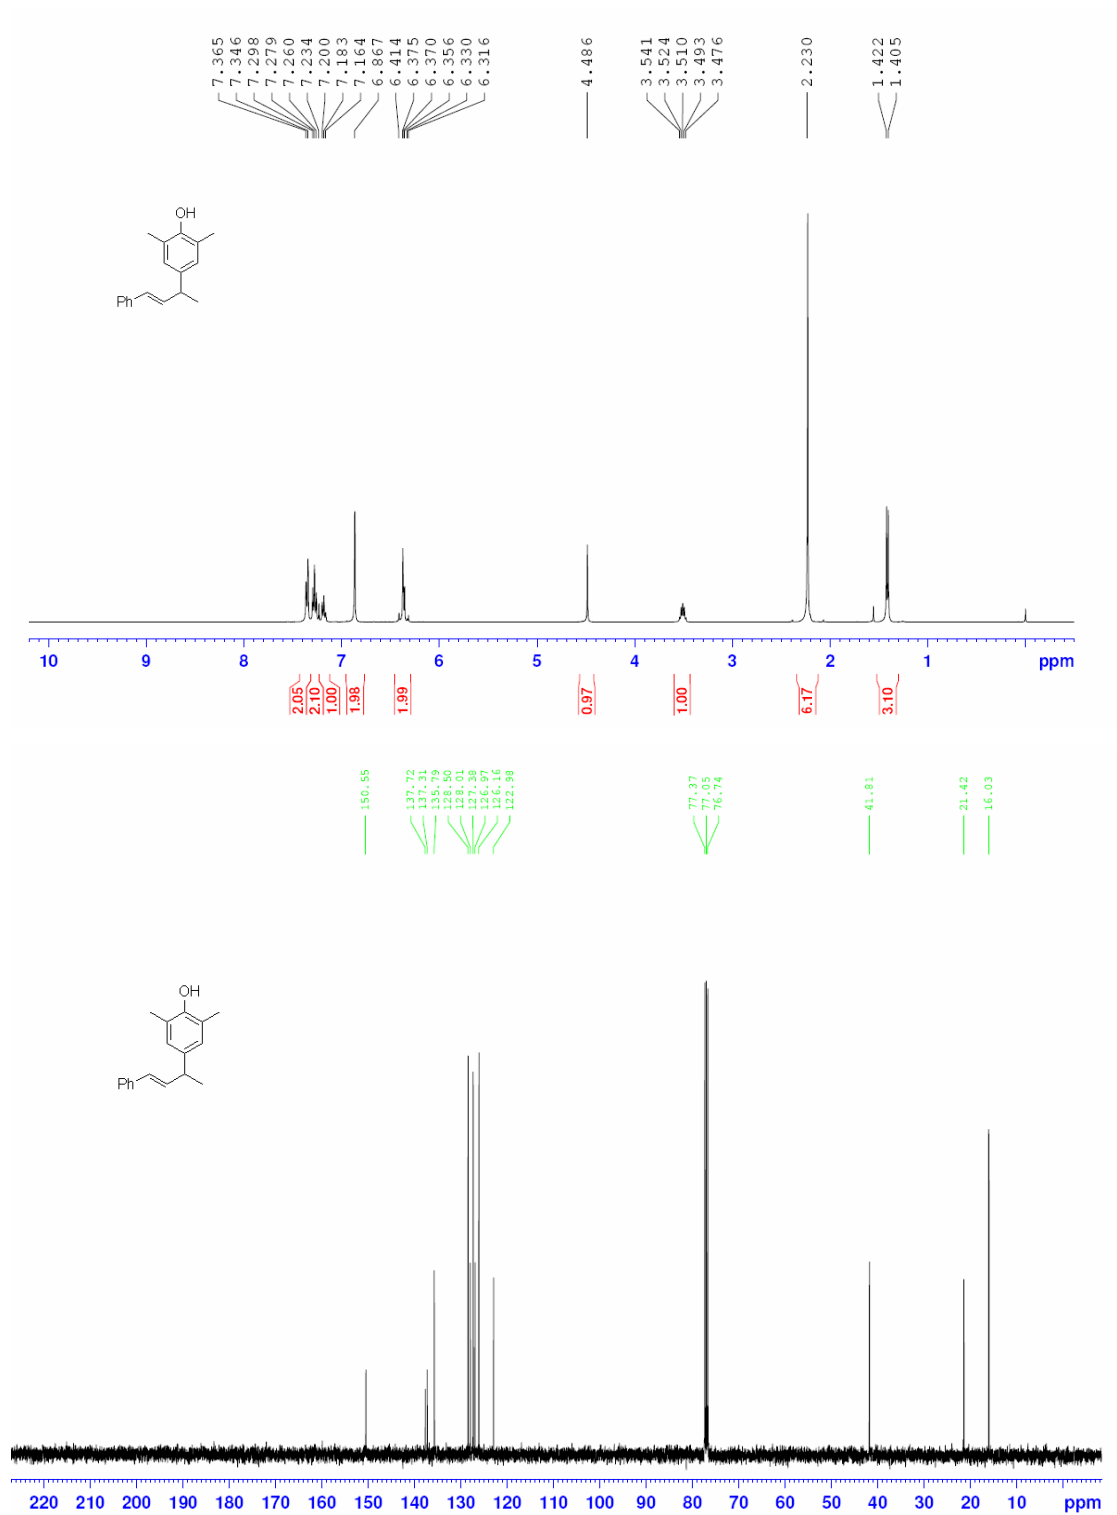

**Figure S11.**  $^1\text{H}$  and  $^{13}\text{C}$  NMR spectra of (*E*)-4-(1,5-diphenylpent-1-en-3-yl)-2-methylphenol (**3k**)

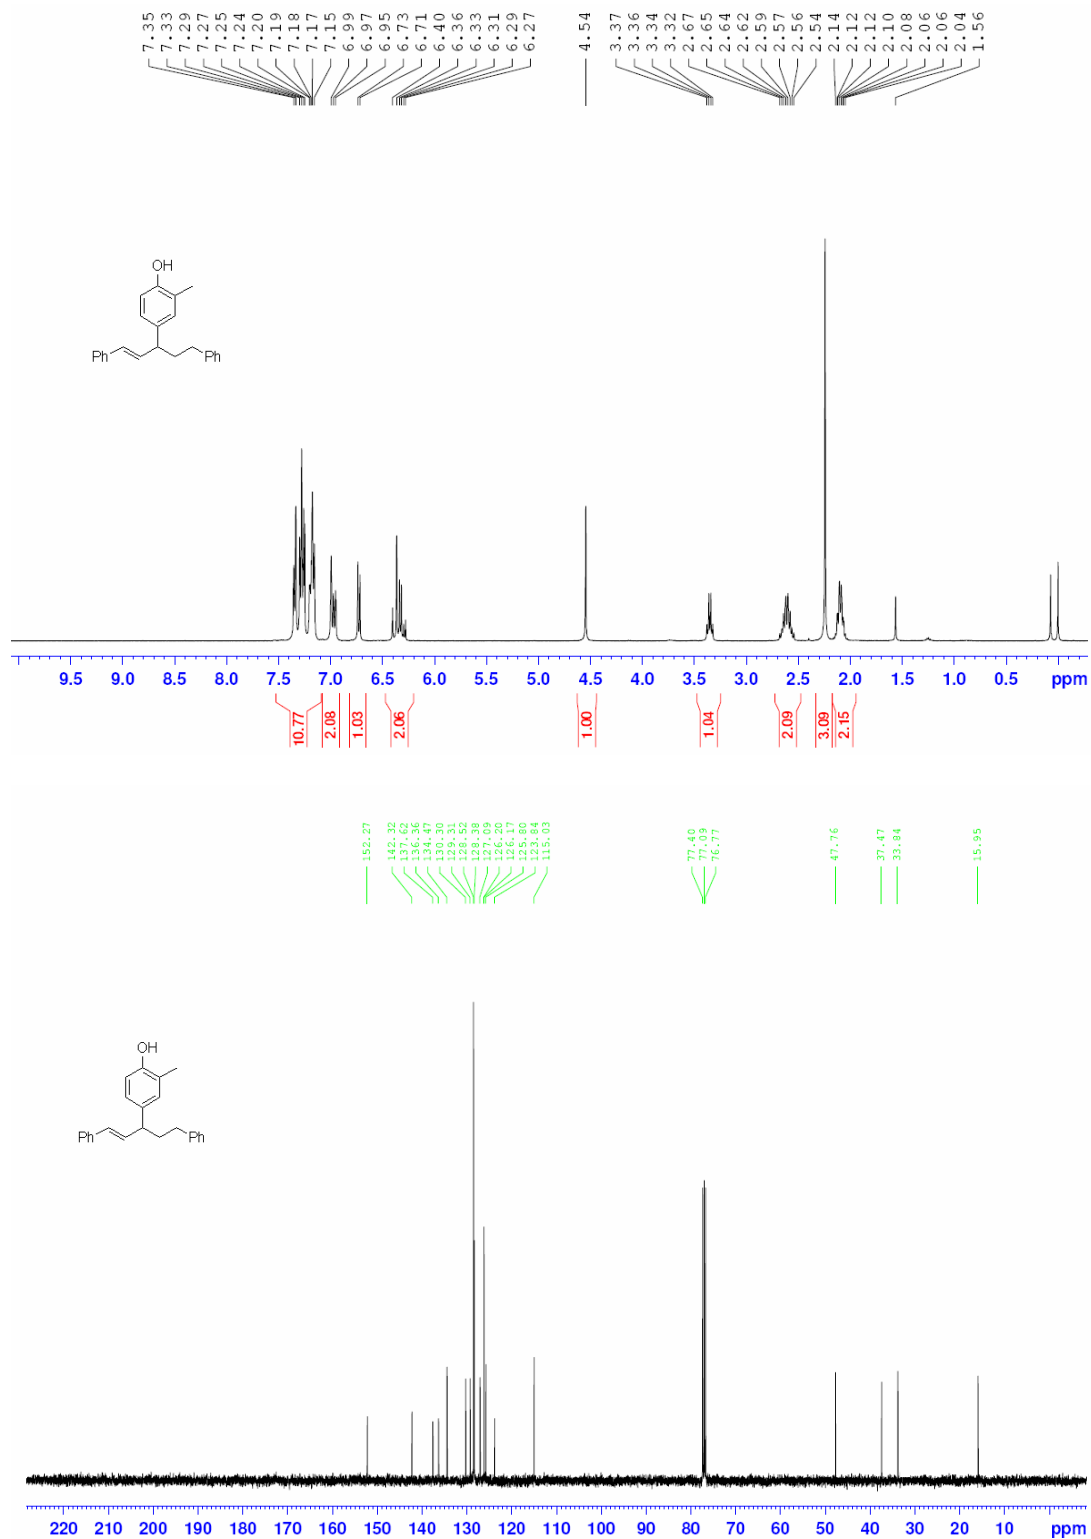

**Figure S12.**  $^1\text{H}$  and  $^{13}\text{C}$  NMR spectra of (*E*)-2-methyl-4-(1-phenylhexa-1,5-dien-3-yl)phenol (**31**)

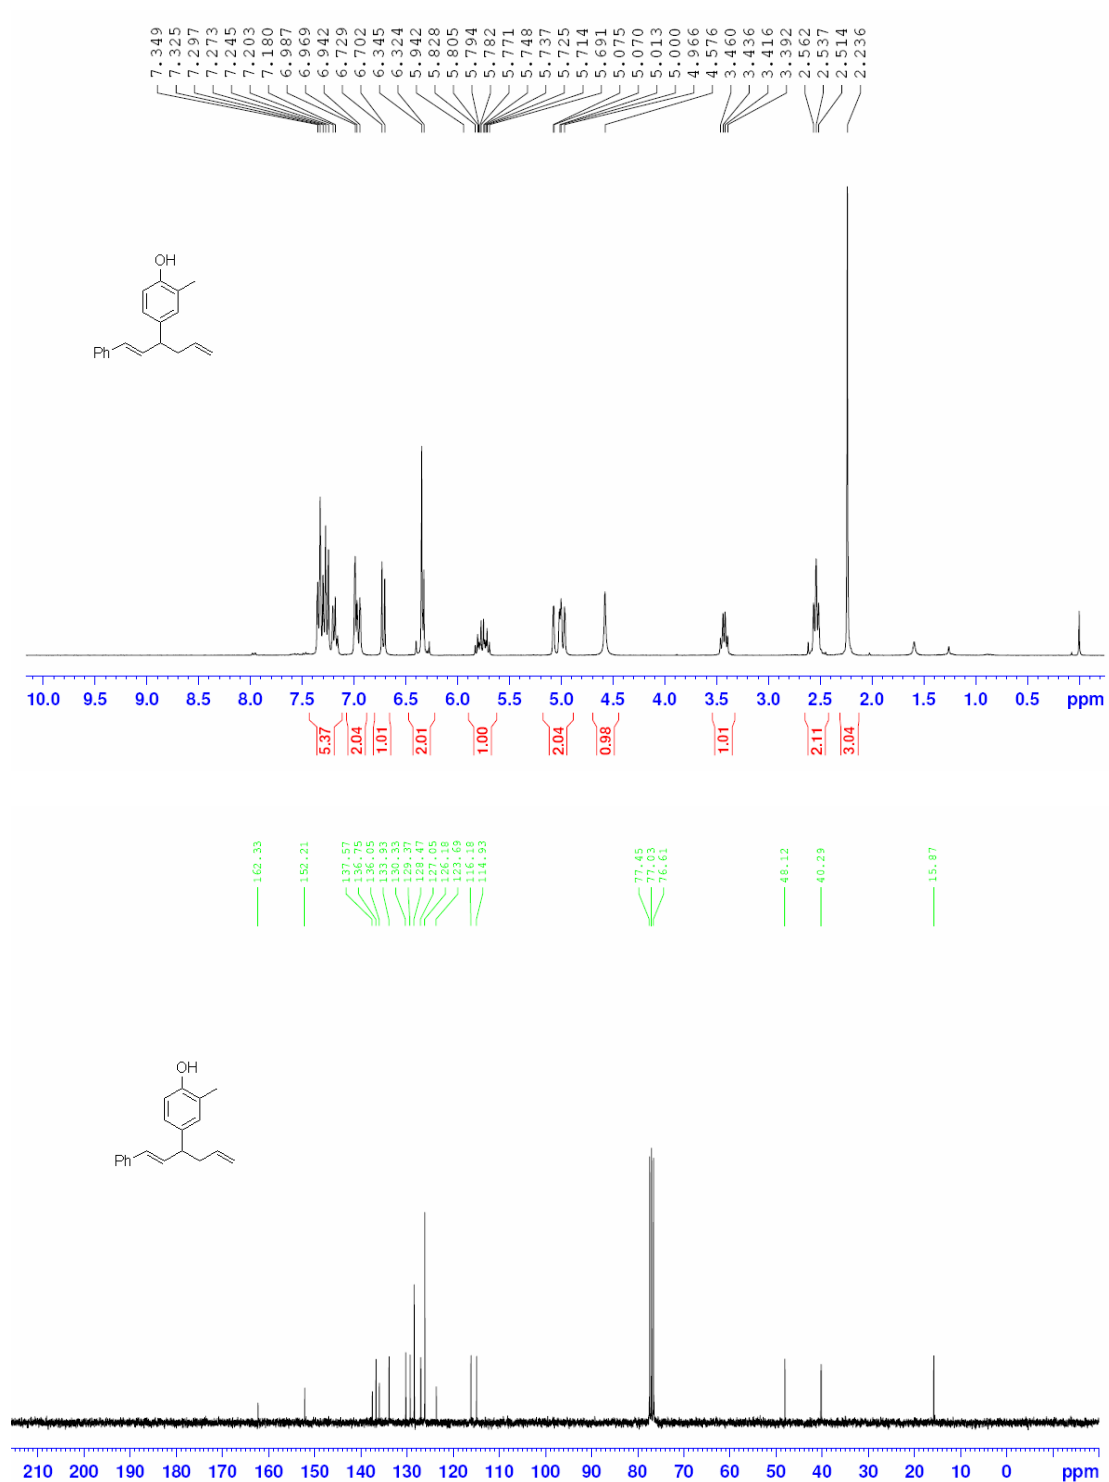

**Figure S13.**  $^1\text{H}$  and  $^{13}\text{C}$  NMR spectra of 4-cinnamyl-2-methylphenol (**3m**)

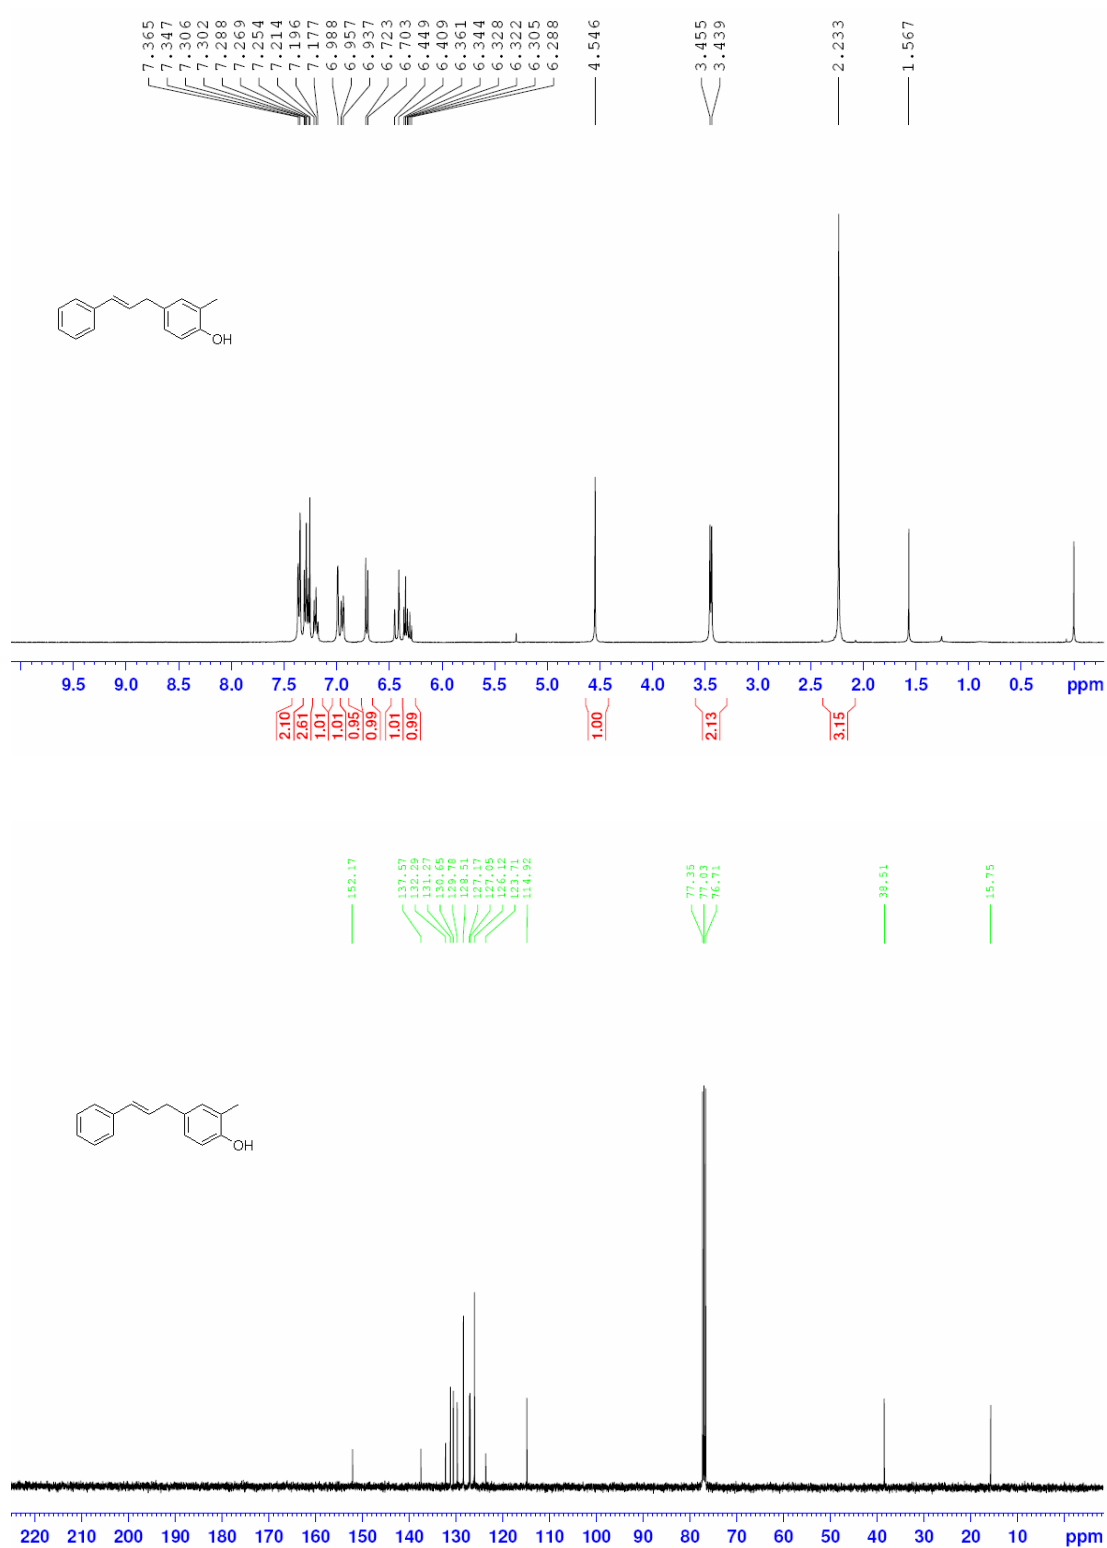

**Figure S14.**  $^1\text{H}$  and  $^{13}\text{C}$  NMR spectra of (*E*)-4-(2-benzylideneoctyl)-2-methylphenol  
**(3n)**

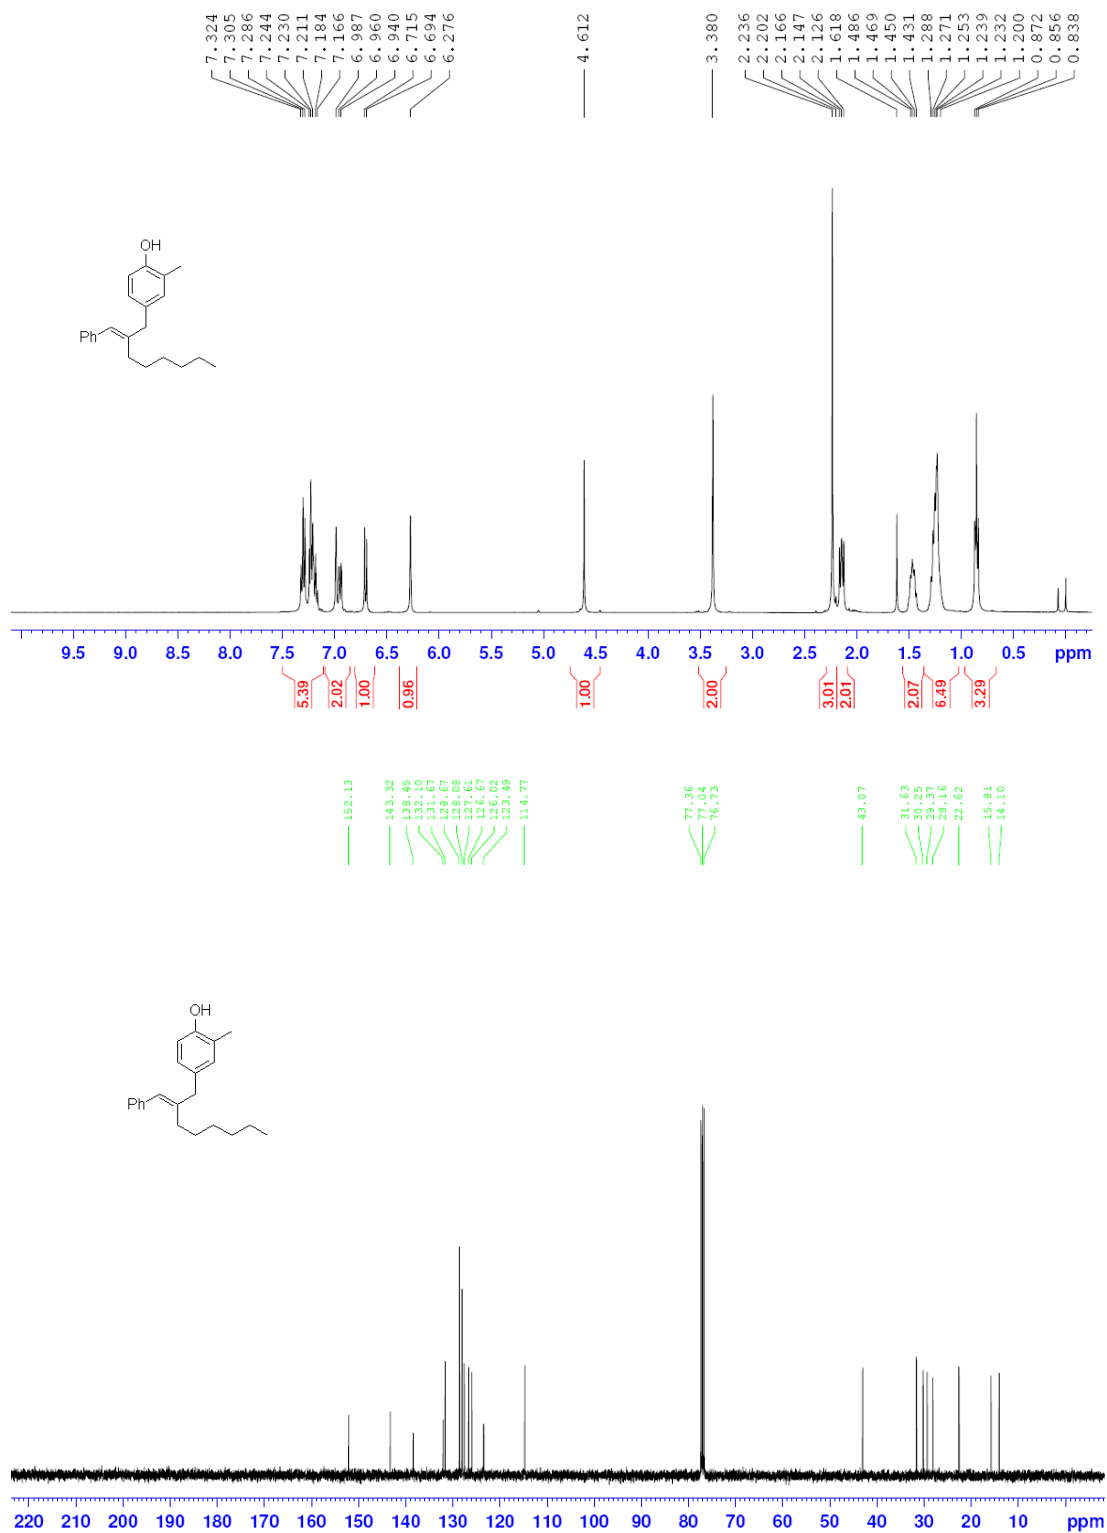



**Figure S15.**  $^1\text{H}$  and  $^{13}\text{C}$  NMR spectra of (*E*)-4-(3-(4-bromophenyl)allyl)-2,6-dimethyl phenol (**3o**)

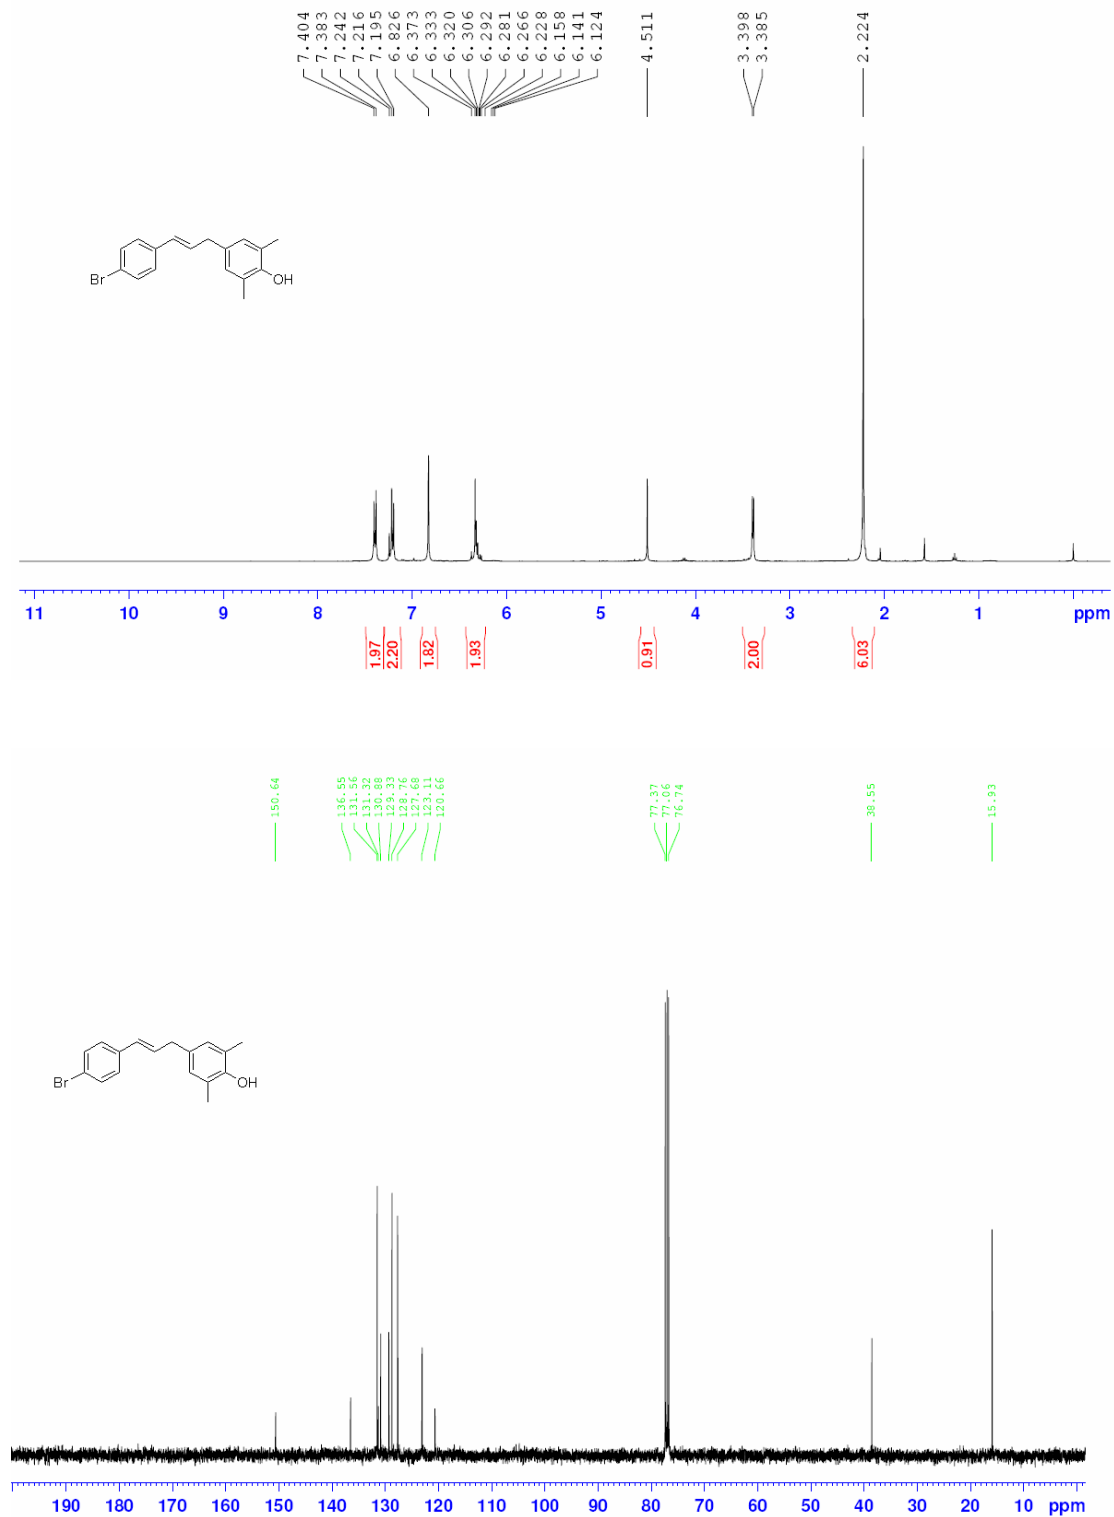

**Figure S16.**  $^1\text{H}$  and  $^{13}\text{C}$  NMR spectra of 4-(3,3-diphenylallyl)-2,6-dimethylphenol  
(3p)

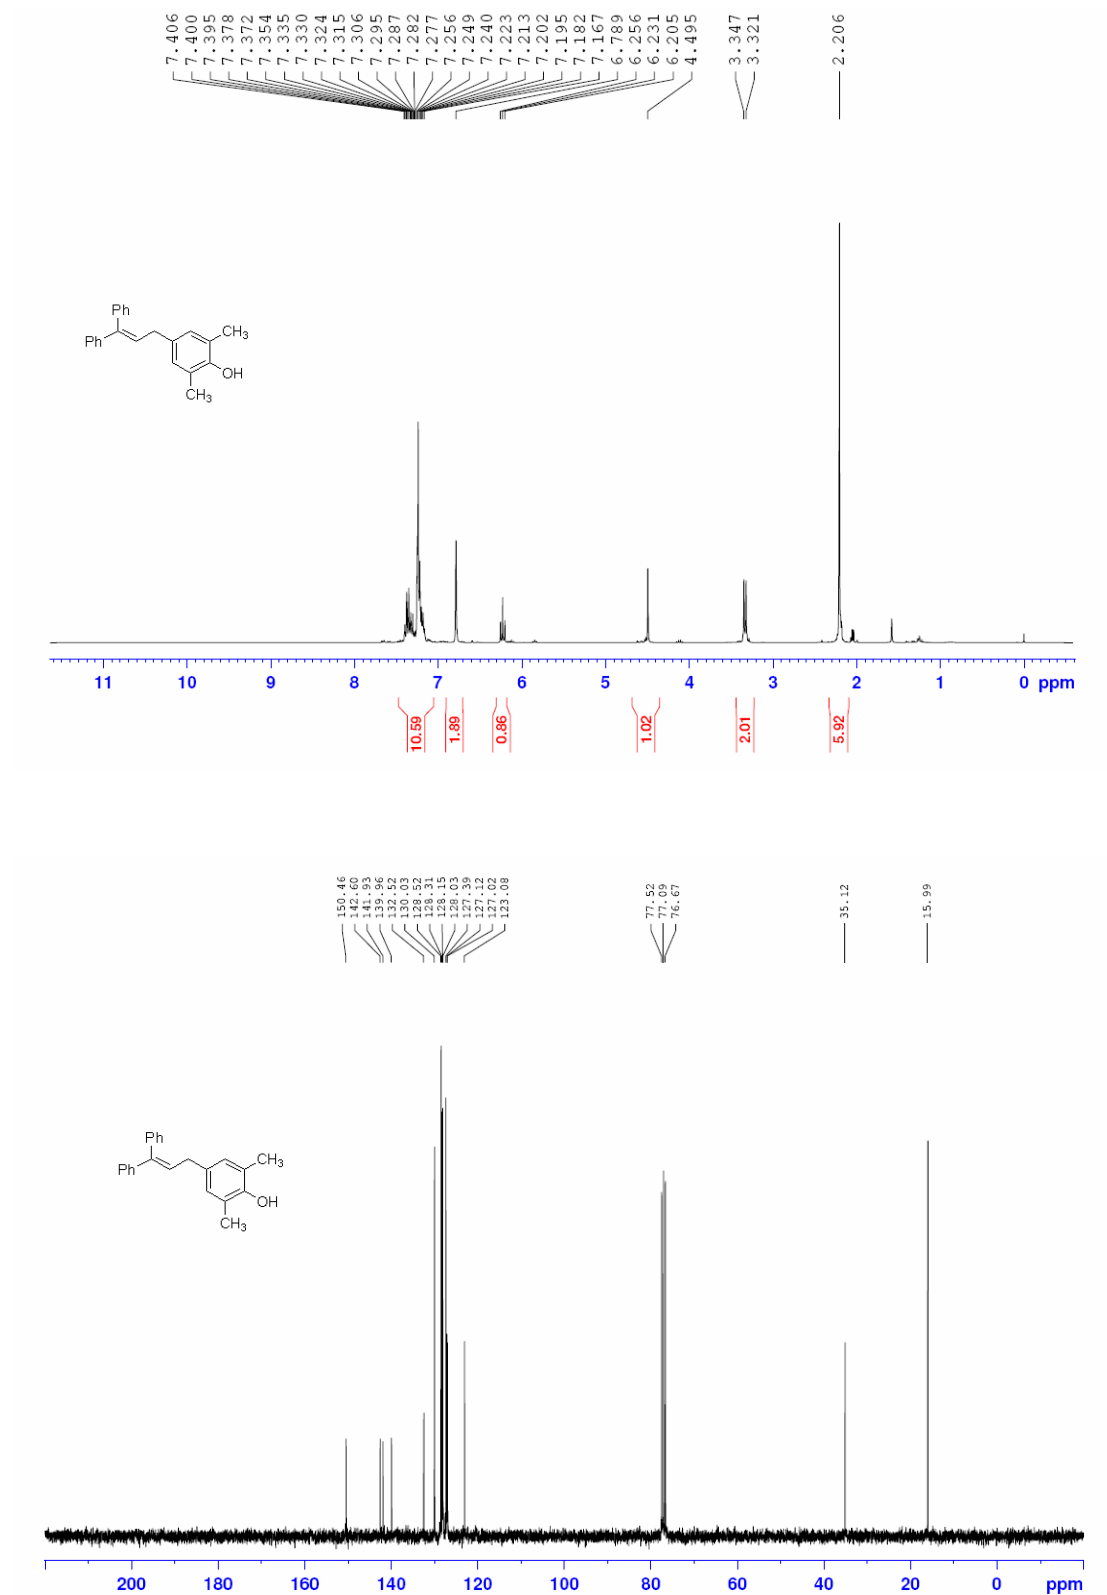

**Figure S17.**  $^1\text{H}$  and  $^{13}\text{C}$  NMR spectra of 4-((3,4-dihydronaphthalen-2-yl)(*p*-tolyl)methyl)-2,6-dimethylphenol (**3q**)

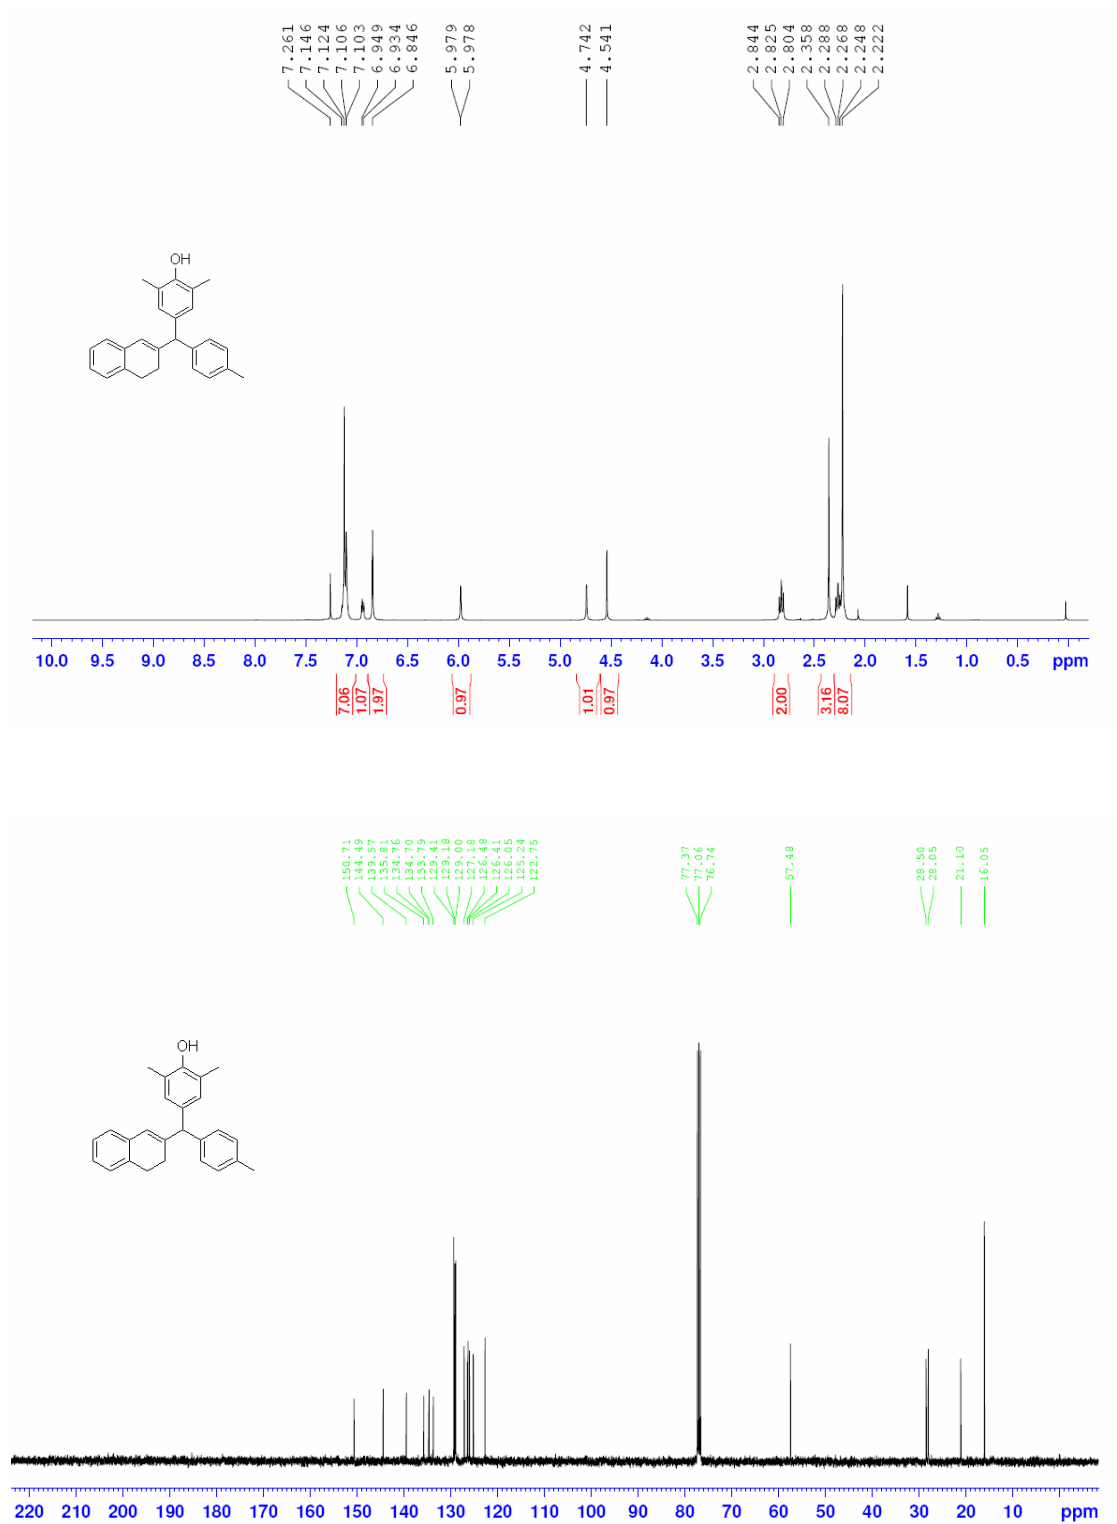

**Figure S18.**  $^1\text{H}$  and  $^{13}\text{C}$  NMR spectra of 2-({4-Hydroxy-3,5-dimethylphenyl}(phenyl)methyl)cyclohex-2-enone (**3r**)

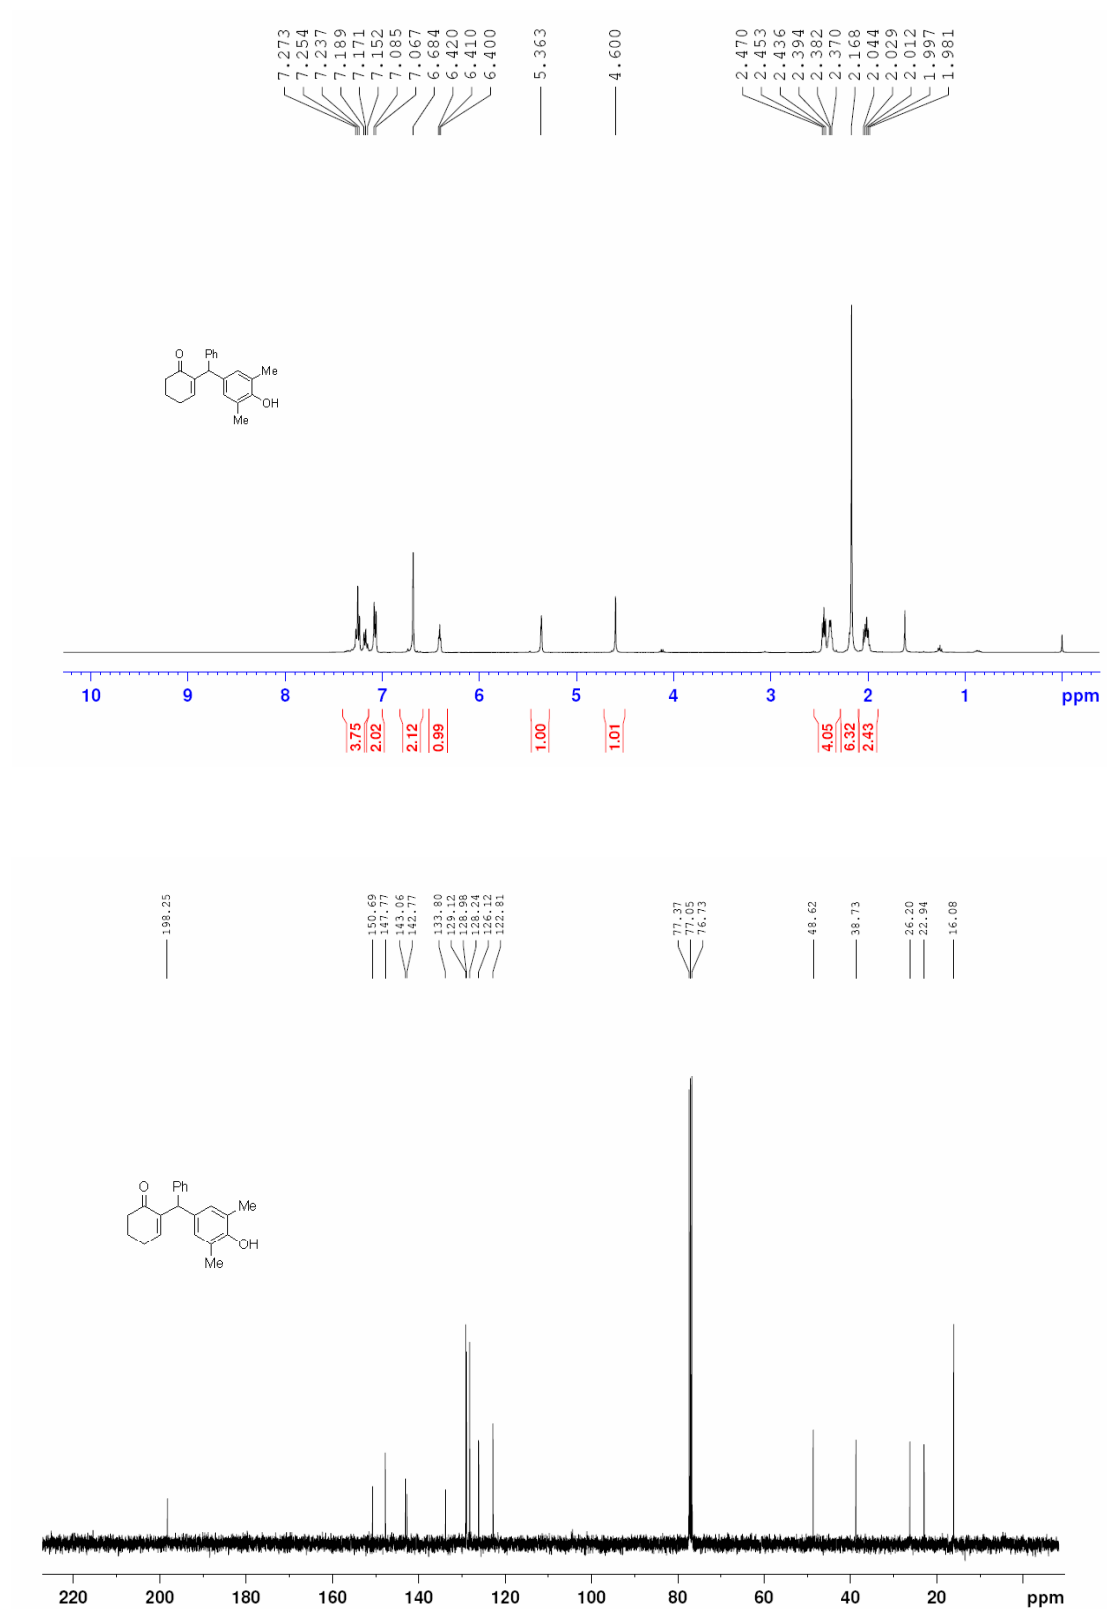

**Figure S19.**  $^1\text{H}$  and  $^{13}\text{C}$  NMR spectra of (*E*)-2-(1,3-bis(4-bromophenyl)allyl)-1H-pyrrole (**3s**)

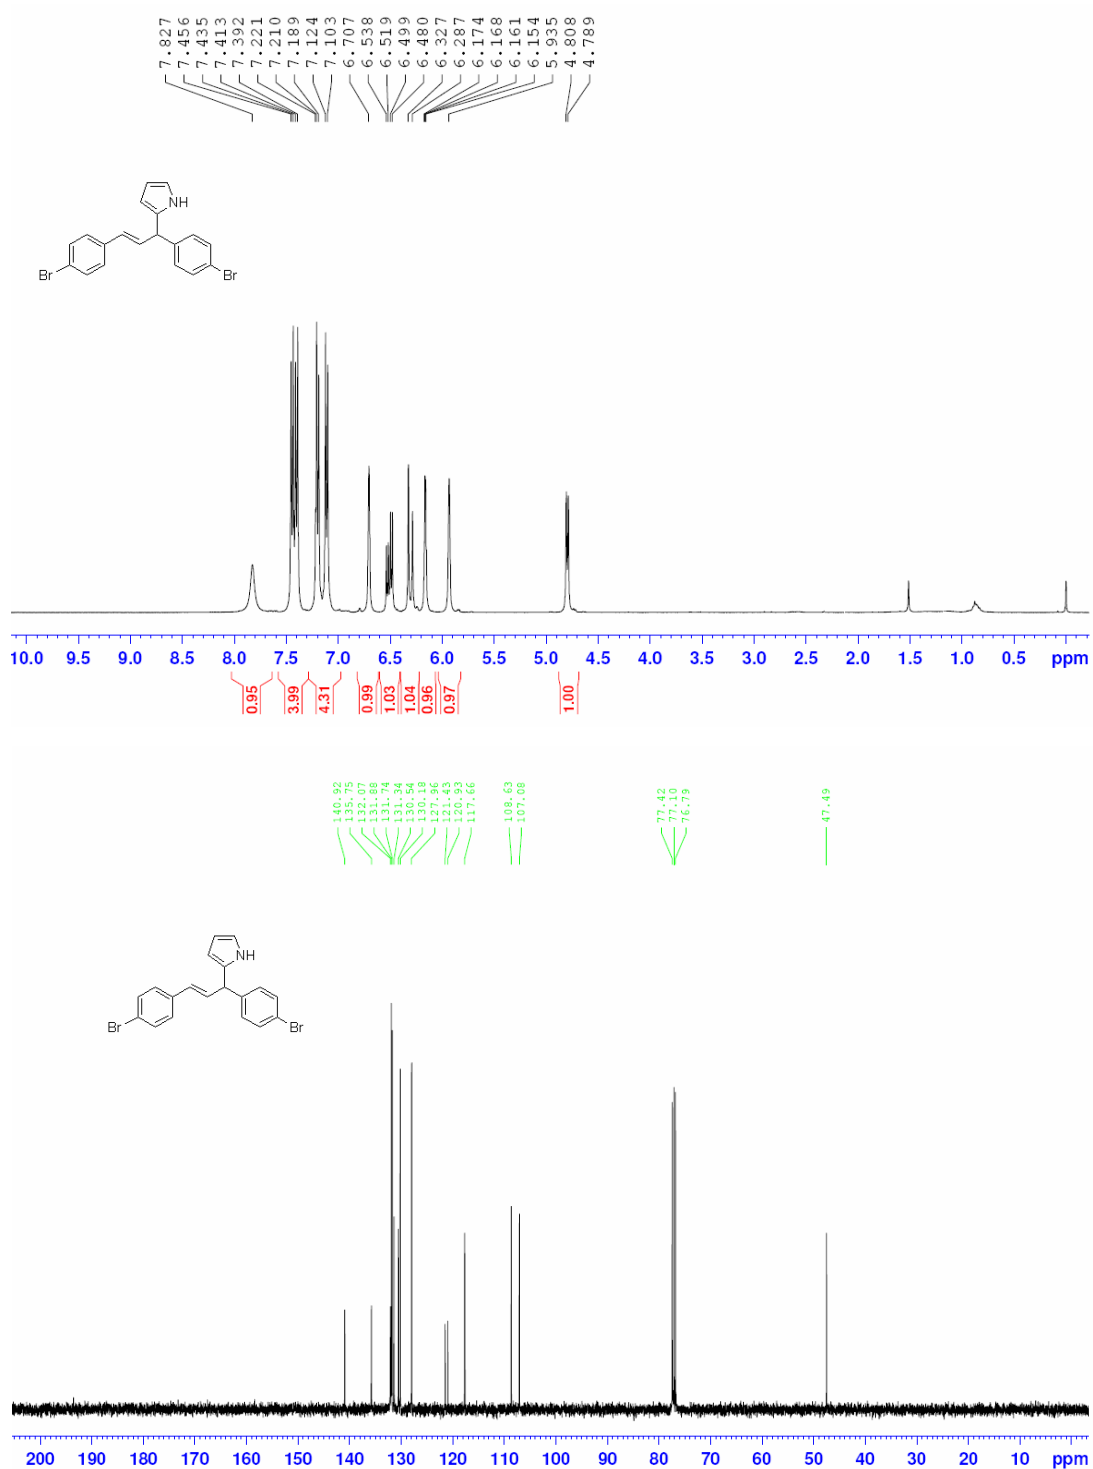

**Figure S20.**  $^1\text{H}$  and  $^{13}\text{C}$  NMR spectra of (*E*)-2-(1,3-di-*p*-tolylallyl)-1H-pyrrole (**3t**)

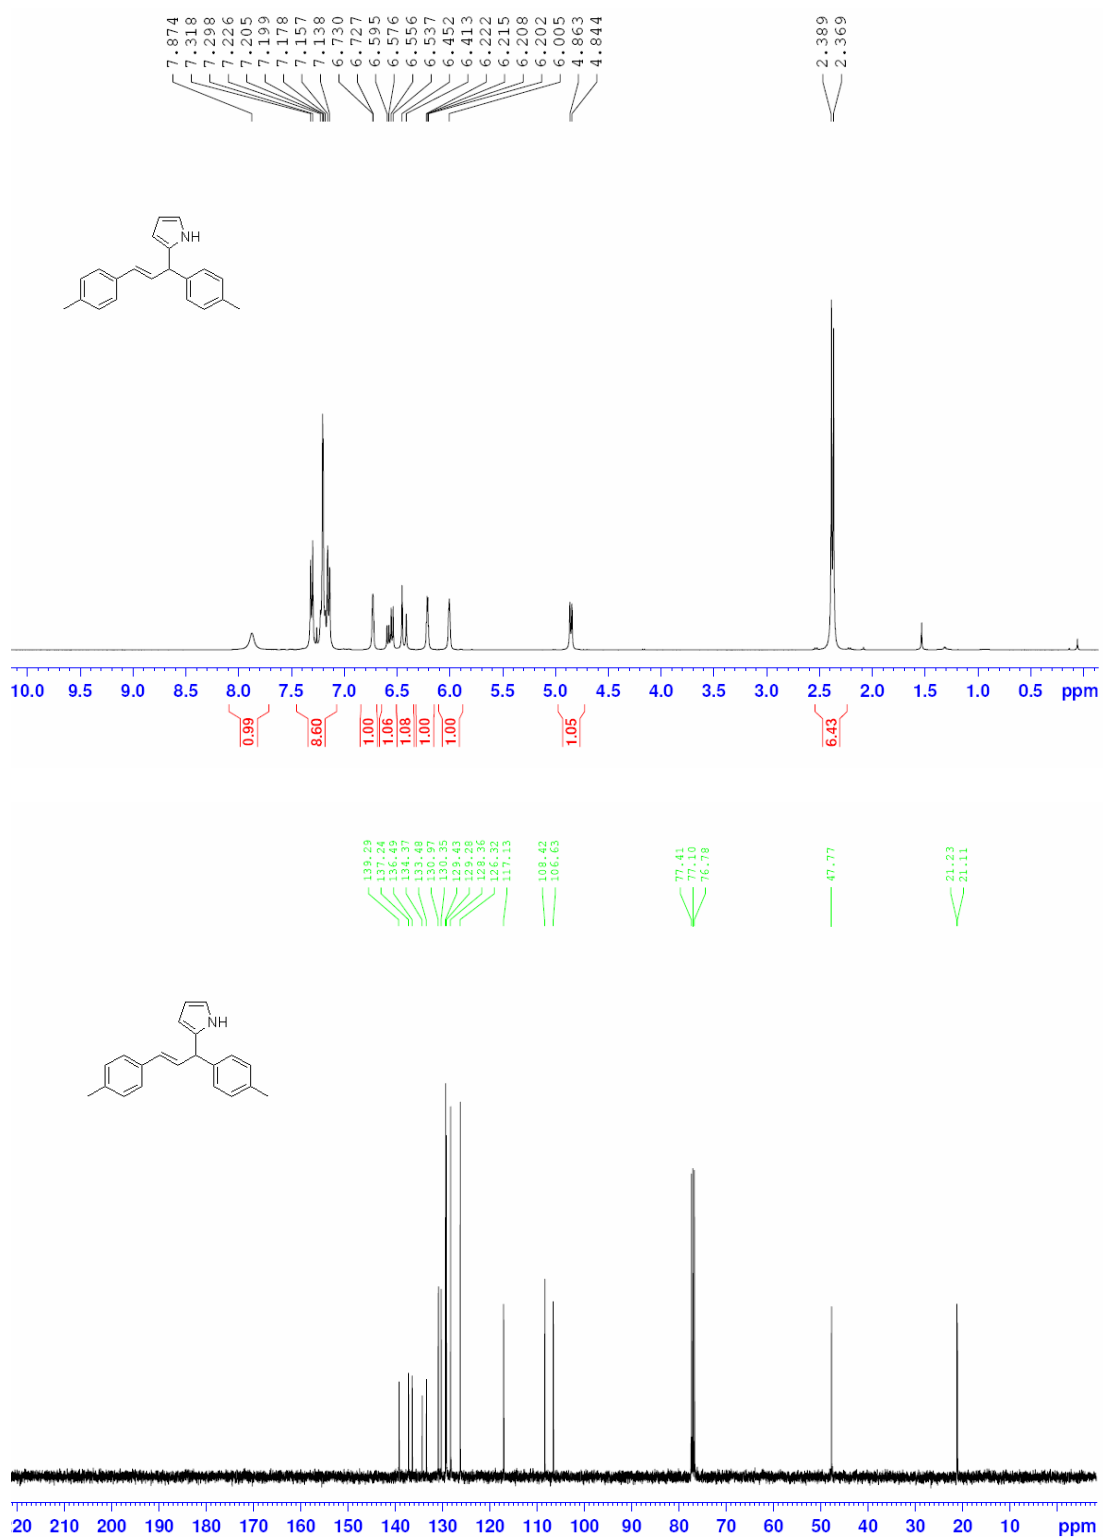

**Figure S21.**  $^1\text{H}$  and  $^{13}\text{C}$  NMR spectra of (*E*)-2-(1,3-diphenylallyl)-1H-pyrrole (**3u**)

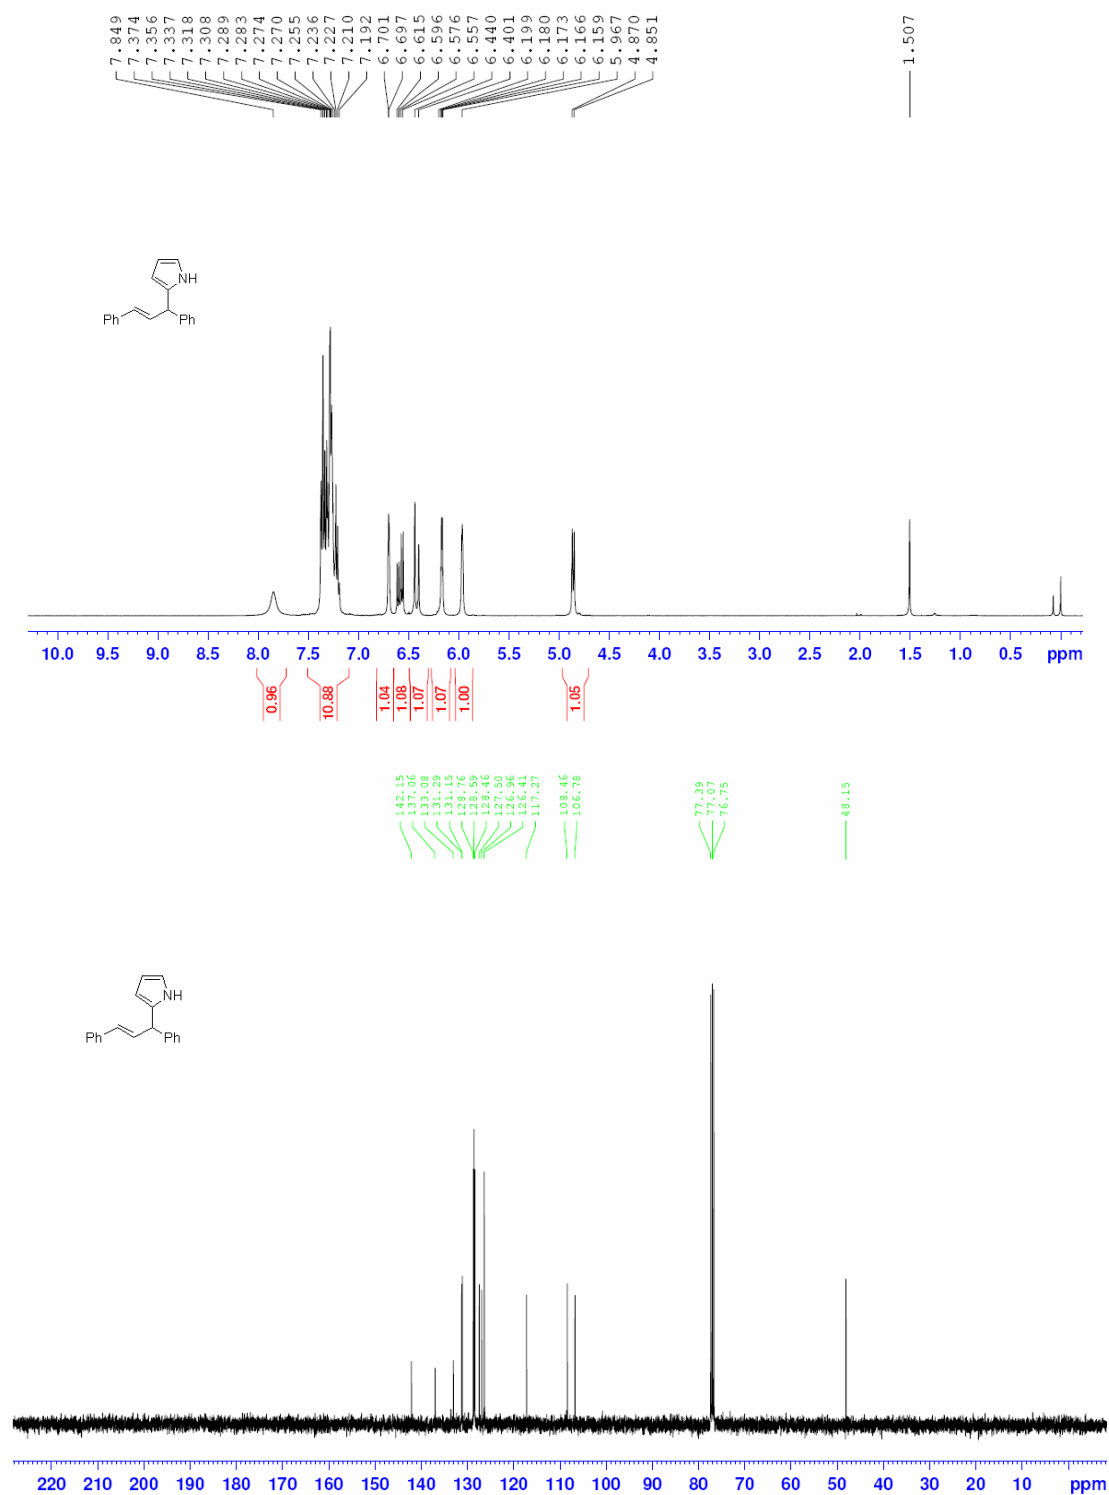

**Figure S22.**  $^1\text{H}$  and  $^{13}\text{C}$  NMR spectra of (*E*)-2-(1,3-bis(4-bromophenyl)allyl)furan (**3v**)

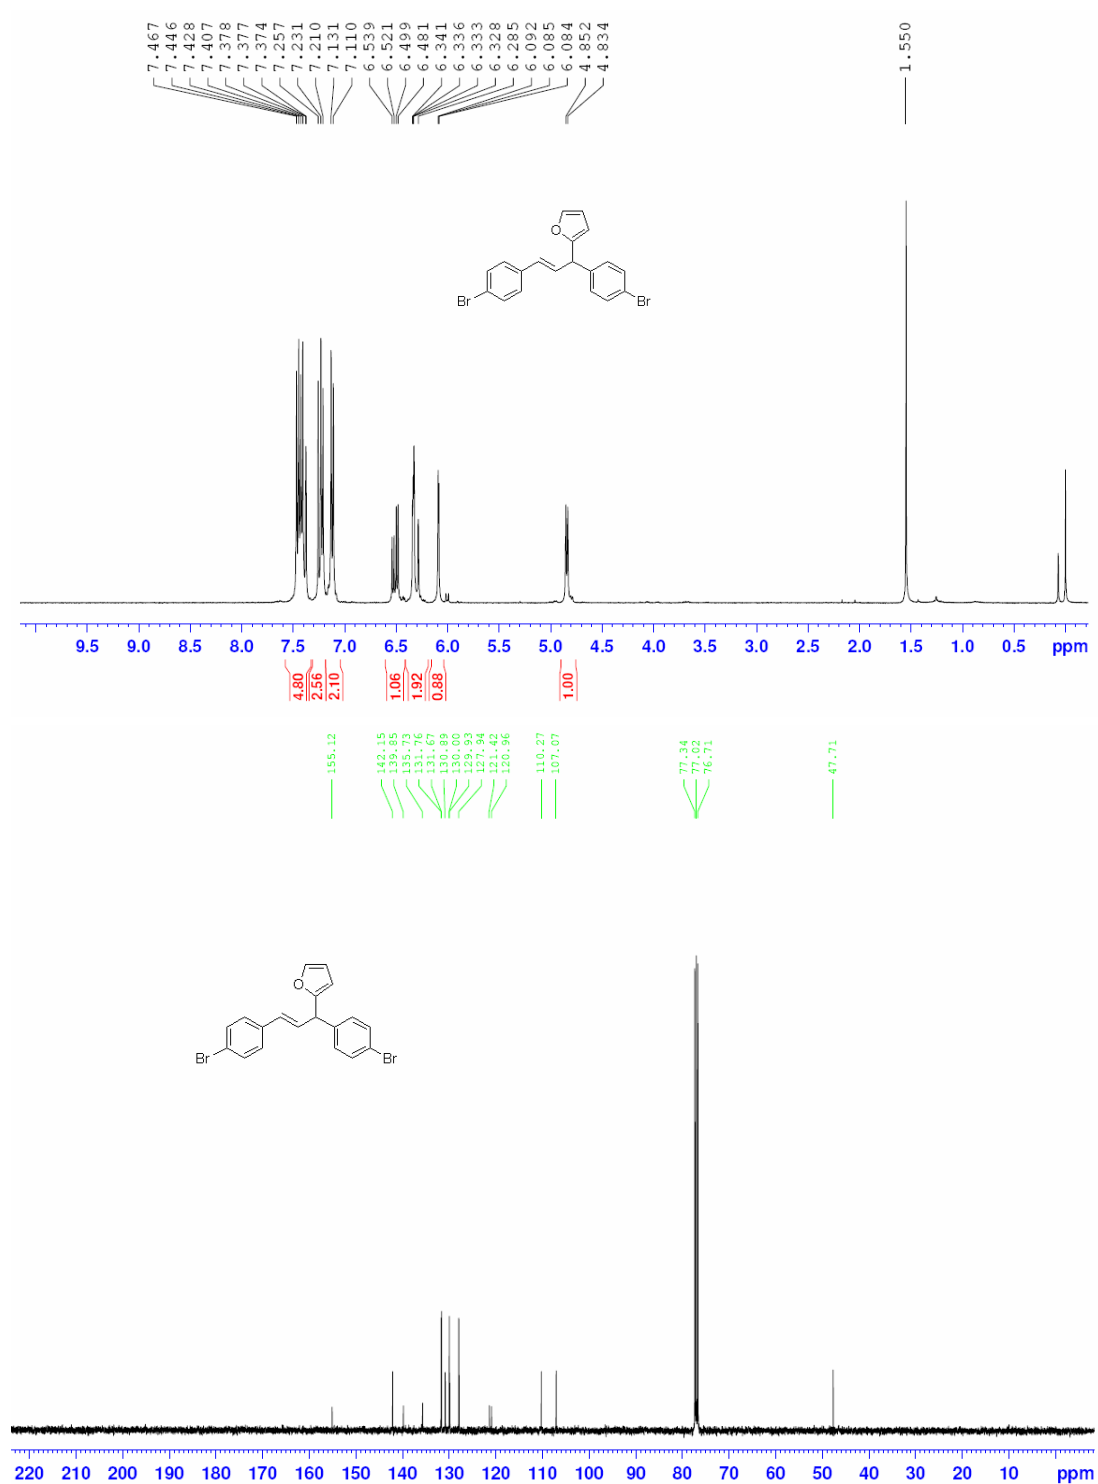



**Figure S23.**  $^1\text{H}$  and  $^{13}\text{C}$  NMR spectra of (*E*)-3-(1,3-bis(4-bromophenyl)allyl)-1-methyl-1H-indole (**3w**)

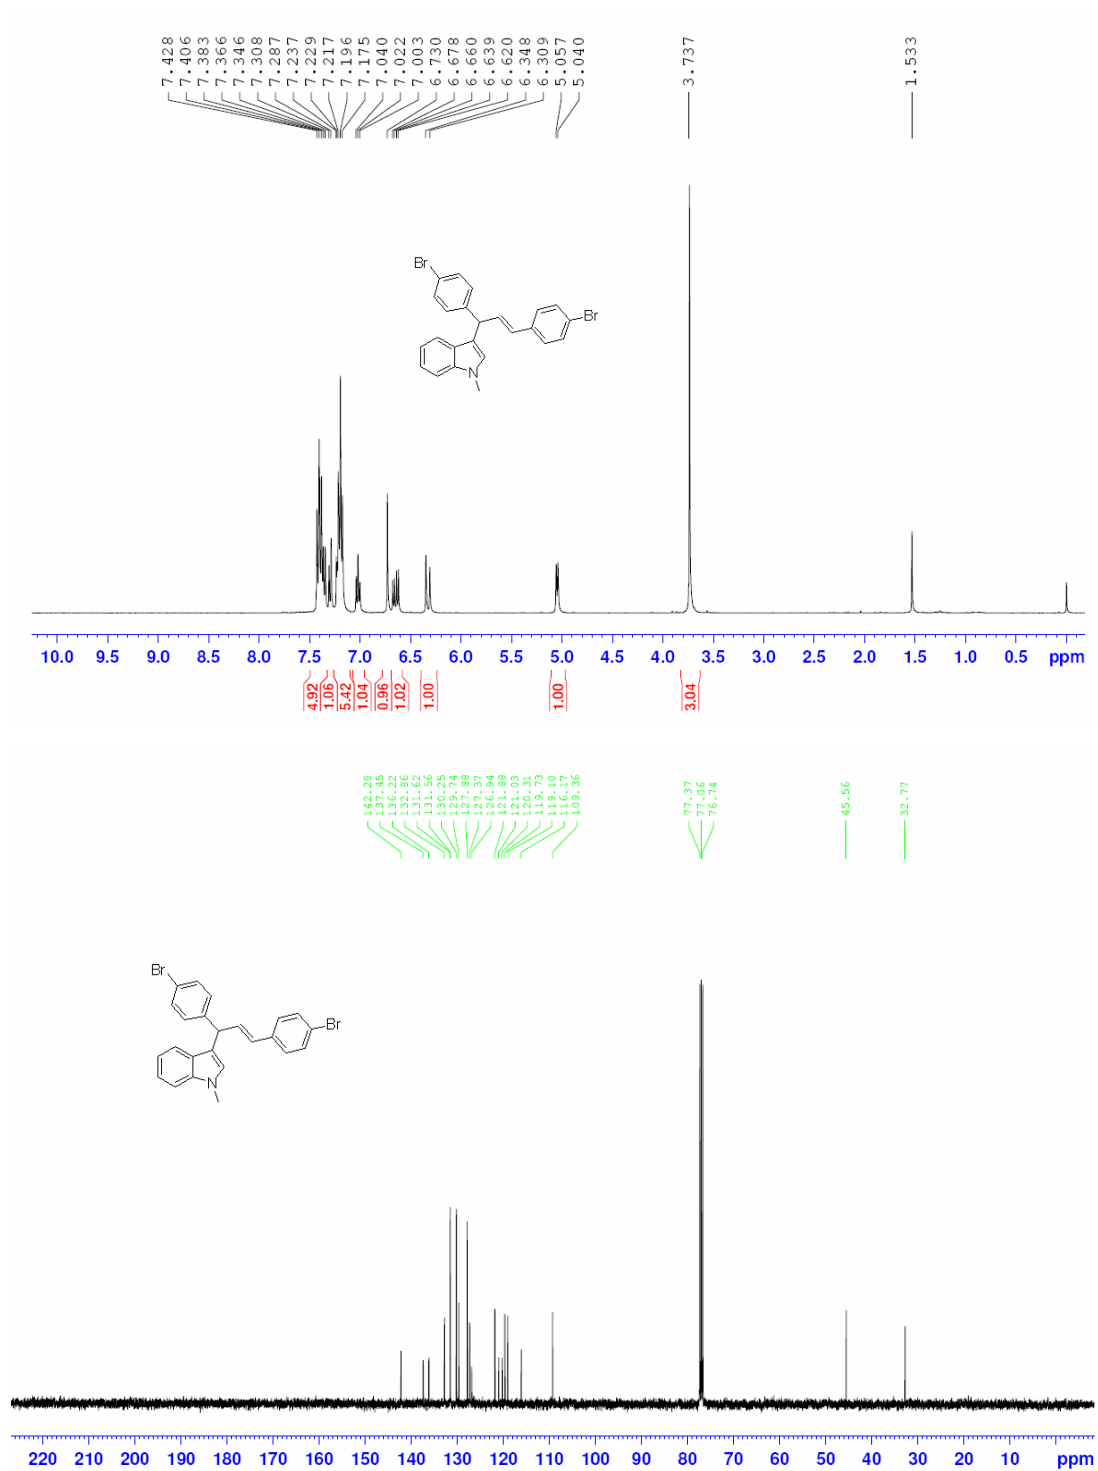

**Figure S24.**  $^1\text{H}$  and  $^{13}\text{C}$  NMR spectra of (*E*)-2-(1,3-bis(4-bromophenyl)allyl)-4-methylphenol (**3x**)

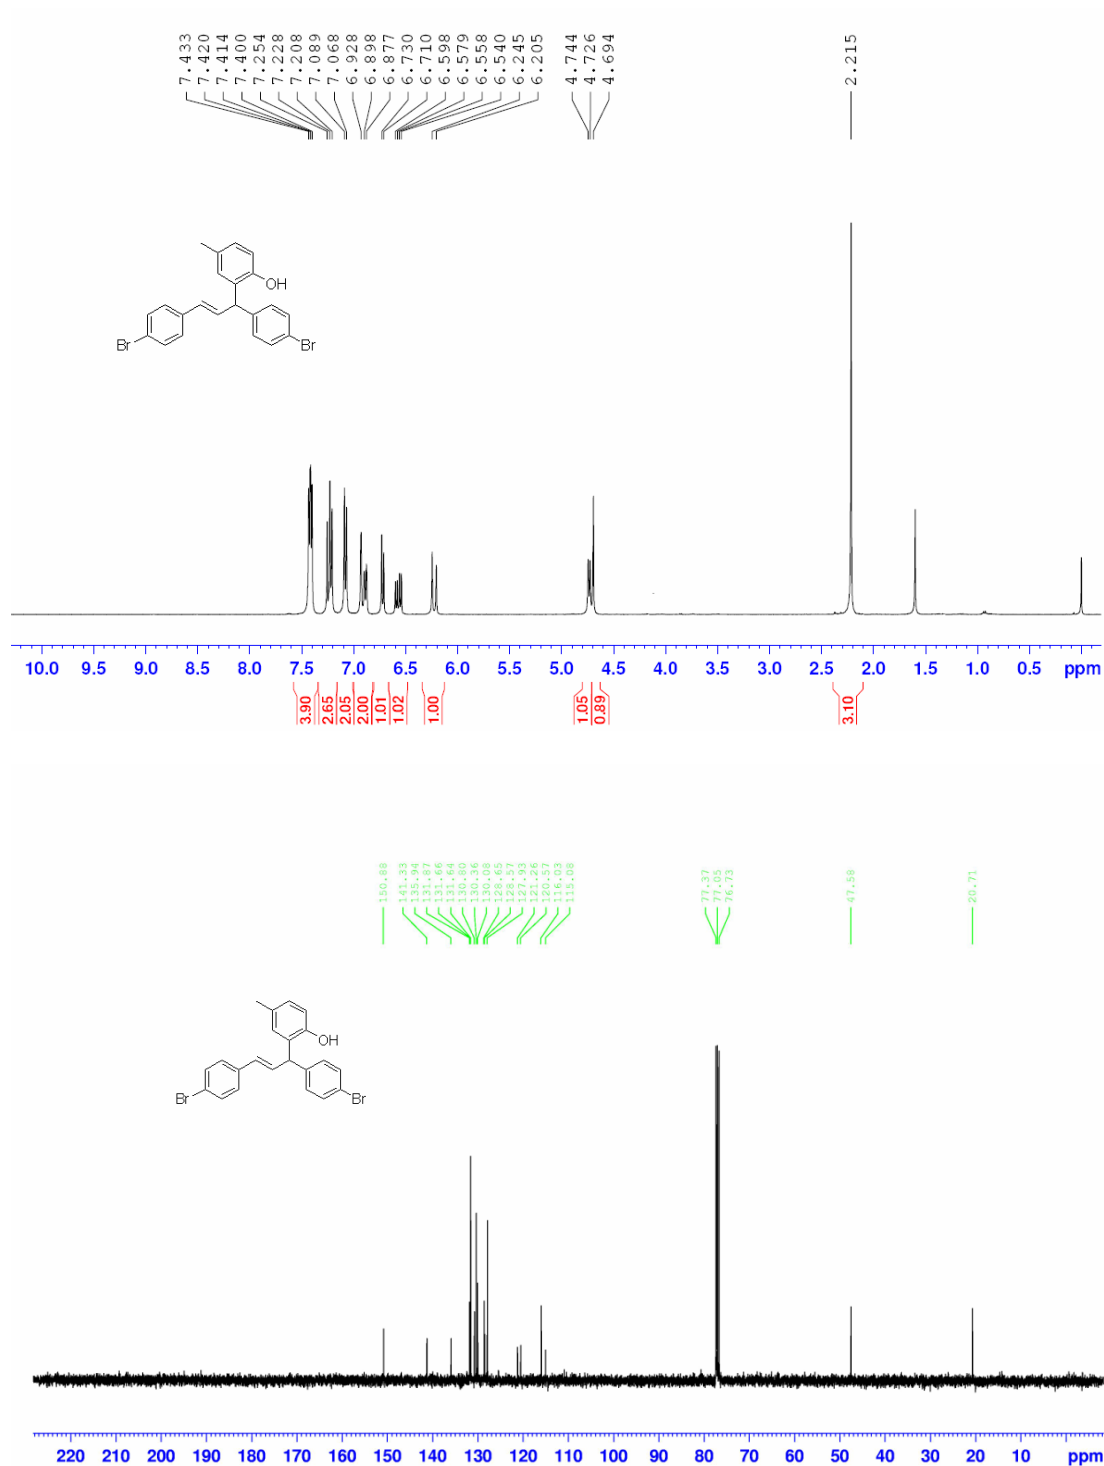

Supplement: b805067h.pdf [file b805067h.pdf]
